# Supplementary material for: Effects of wildfire on streambed sediment in the Cascades and Klamath regions of the Pacific Northwest
Source: Research Square preprint supplement (doi:10.21203/rs.3.rs-7359437/v1), 2025-09-11
Supplement: Supplementary file 1 [file db95edc7d7714f68c9c048b3.docx]

**Effects of wildfire on streambed sediment in the Cascades and Klamath provinces of the Pacific Northwest**

Wall et al., 2025

SUPPLEMENTAL MATERIALS

APPENDIX A. Table of model fit parameters


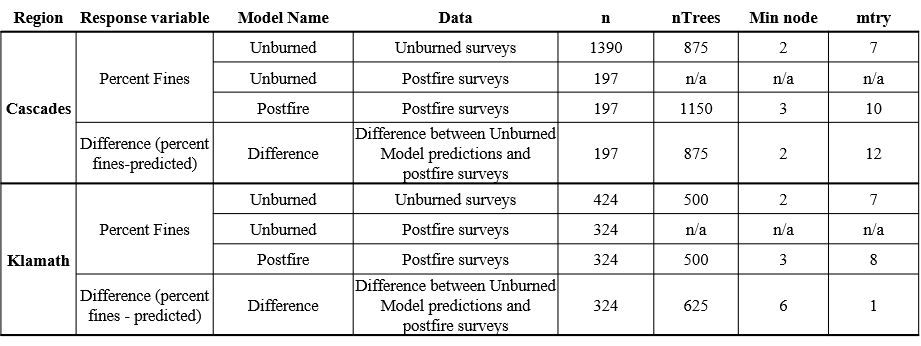


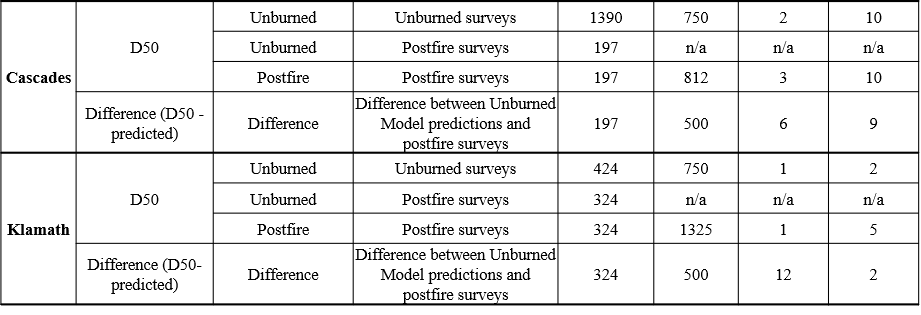


APPENDIX B. Key for covariate abbreviations

| **Variables** | **Abbreviation** | **Unit** | **Spatial Extent** | **Category** |
| --- | --- | --- | --- | --- |
| SITE ID | SITE_ID | Categorical | Reach | Location |
| Watershed ID | CREEK_CODE | Categorical | HUC12 Watershed | Location |
| Survey Year | Survey_year | years | Reach | Temporal |
| Mean Bankfull Width | Bankfull_mean | m | Reach | Stream Morphology |
| Relative bankfull | Relative_bankfull | - | Reach | Temporal |
| Streambed Slope | Stream_slope | degrees | Reach | Stream Morphology |
| Valley Confinement | Confinement | Categorical | Reach | Stream Morphology |
| In-Stream Large Wood | Frequency_km | Units/km | Reach | Stream Morphology |
| High Flow Count | High_flow_count | - | Nearest USGS Gage | Climate |
| Subwatershed Area | Area_sqkm.x | Km2 | Subwatershed | Topography |
| % of subwatershed with slopes  > 23 degrees | Slope23d_perc_greater | % | Subwatershed | Topography |
| Mean Elevation | Elev_mean | m | Subwatershed | Topography |
| Baseflow Index | BFIWS | % | Subwatershed | Climate |
| 30-year Normal Precipitation | PRECIP8110WS | mm | Subwatershed | Climate |
| 30-year Mean Temperature | TMEAN8110WS | celsius | Subwatershed | Climate |
| Mean Rock Compressive Strength | COMPSTRGTHWS | megaPascals | Subwatershed | Lithology/Soils |
| Mean Lithological Hydraulic Conductivity | HYDRLCONDWS | micrometers/s | Subwatershed | Lithology/Soils |
| Dominant Geology | Dom_geology | Categorical | Subwatershed | Lithology/Soils |
| Mean Soil Erodibility Factor | KFFACTWS | - | Subwatershed | Lithology/Soils |
| Soil Permeability | PERMWS | cm/hr | Subwatershed | Lithology/Soils |
| Mean Soil Depth to Bedrock | RCKDEPWS | cm | Subwatershed | Lithology/Soils |
| Soil Organic Matter Content | OMWS | % | Subwatershed | Lithology/Soils |
| Mean Tree Age | Mean_ad | years | Subwatershed | Land Cover |
| Mean Canopy Cover | Mean_cc | % | Subwatershed | Land Cover |
| Road Crossings | RDCRSWS | crossings/sqkm | Subwatershed | Land Cover |
| Upslope Road Density | RDDENSWS | km/sqkm | Subwatershed | Land Cover |
| Years Between Survey and Fire | YPF | Years | Subwatershed | Fire |
| Area of Subwatershed Burned | Ppc_burned_sqkm | Sqkm | Subwatershed | Fire |
| Area of Subwatershed Burned at Himod | Ppc_himod_sqkm | Sqkm | Subwatershed | Fire |
| Area of Riparian Area Burned | Rip_burned_sqkm | Sqkm | Riparian | Fire |
| Area of Riparian Area Burned at Himod | Rip_himod_sqkm | Sqkm | Riparian | Fire |
| Area of Reach Burned | Reach_burned_sqkm | Sqkm | Reach | Fire |
| Area of Reach Burned at Himod | Reach_himod_sqkm | Sqkm | Reach | Fire |
| Fire Rank | Rank.x | Count | Subwatershed | Fire |

APPENDIX C. Full Variable Importance Plots for the Unburned and Post-fire Percent Fines and D50 models


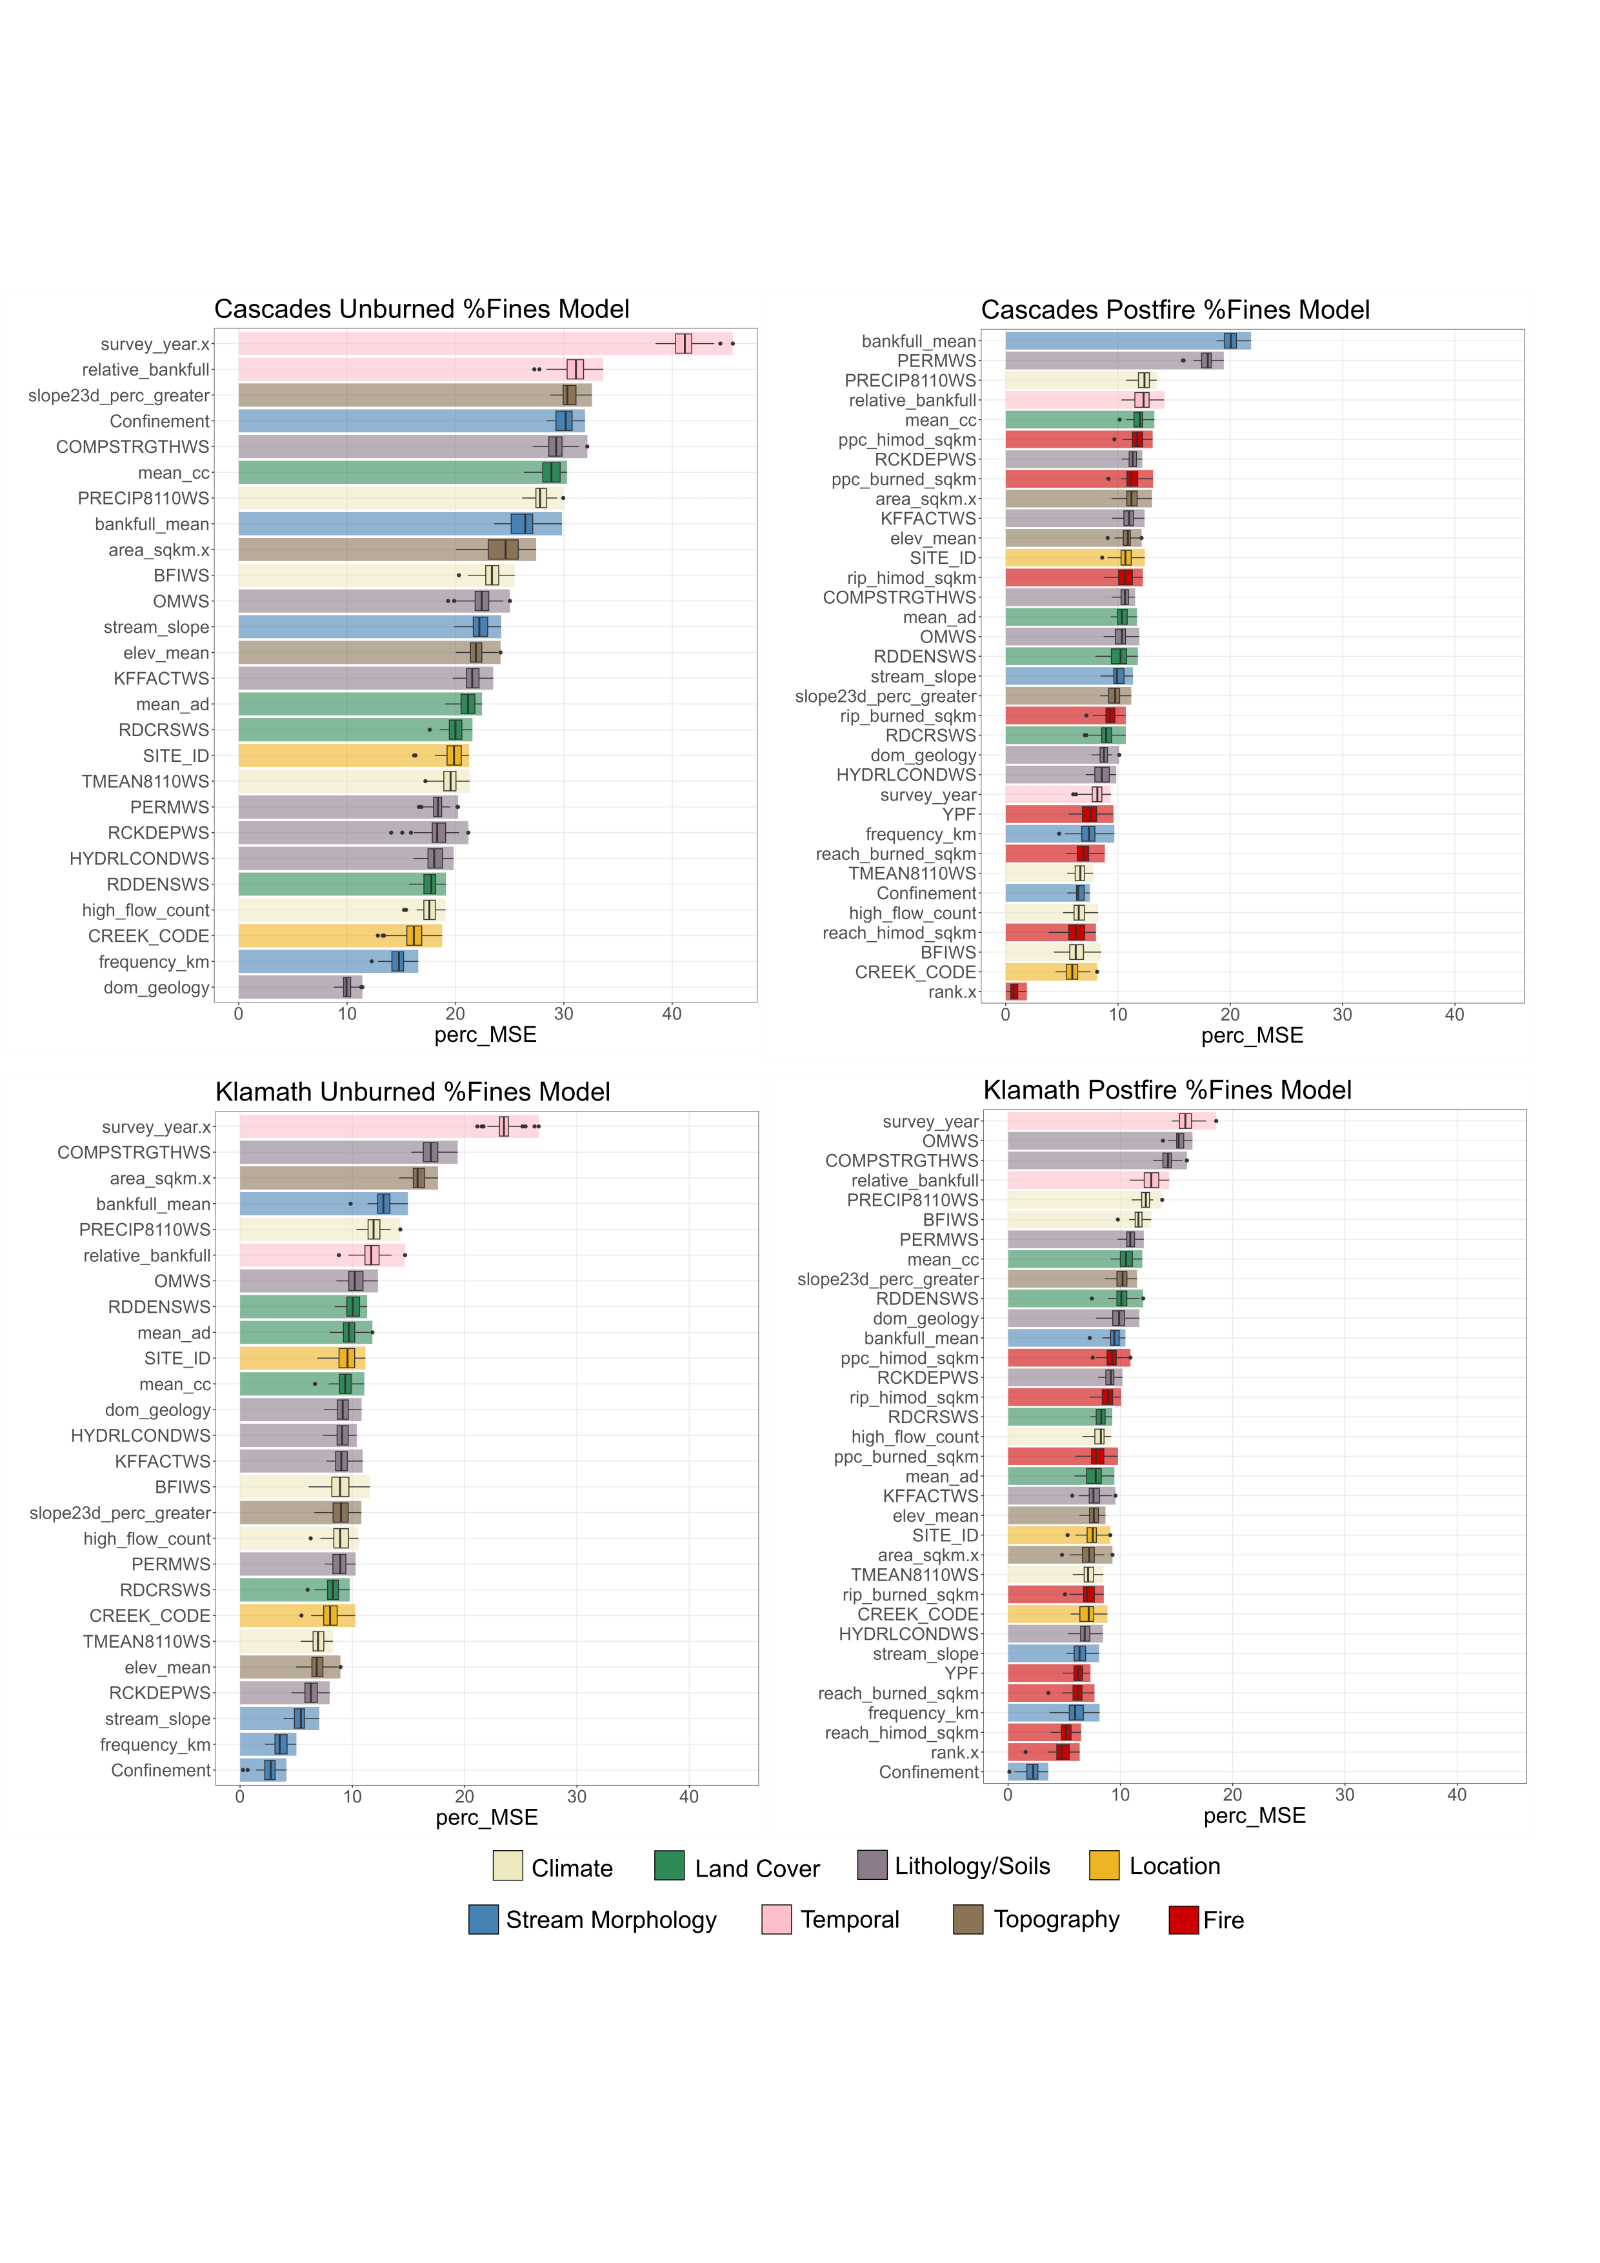
Figure 1. Full variable importance plots for the Unburned and Post-fire Percent Fines models. This Figure complements Figure 3 in the text. Boxplots summarize the importance output from 50 model runs. Variable Important plot for the Unburned Percent Fines model that was trained using solely unburned and pre-fire data for the Cascades (upper left) and Klamath (lower left) regions. Variable Important plot for the Post-fire Percent Fines model that was trained using solely postfire data for the Cascades (upper right) and Klamath (bottom right) regions.


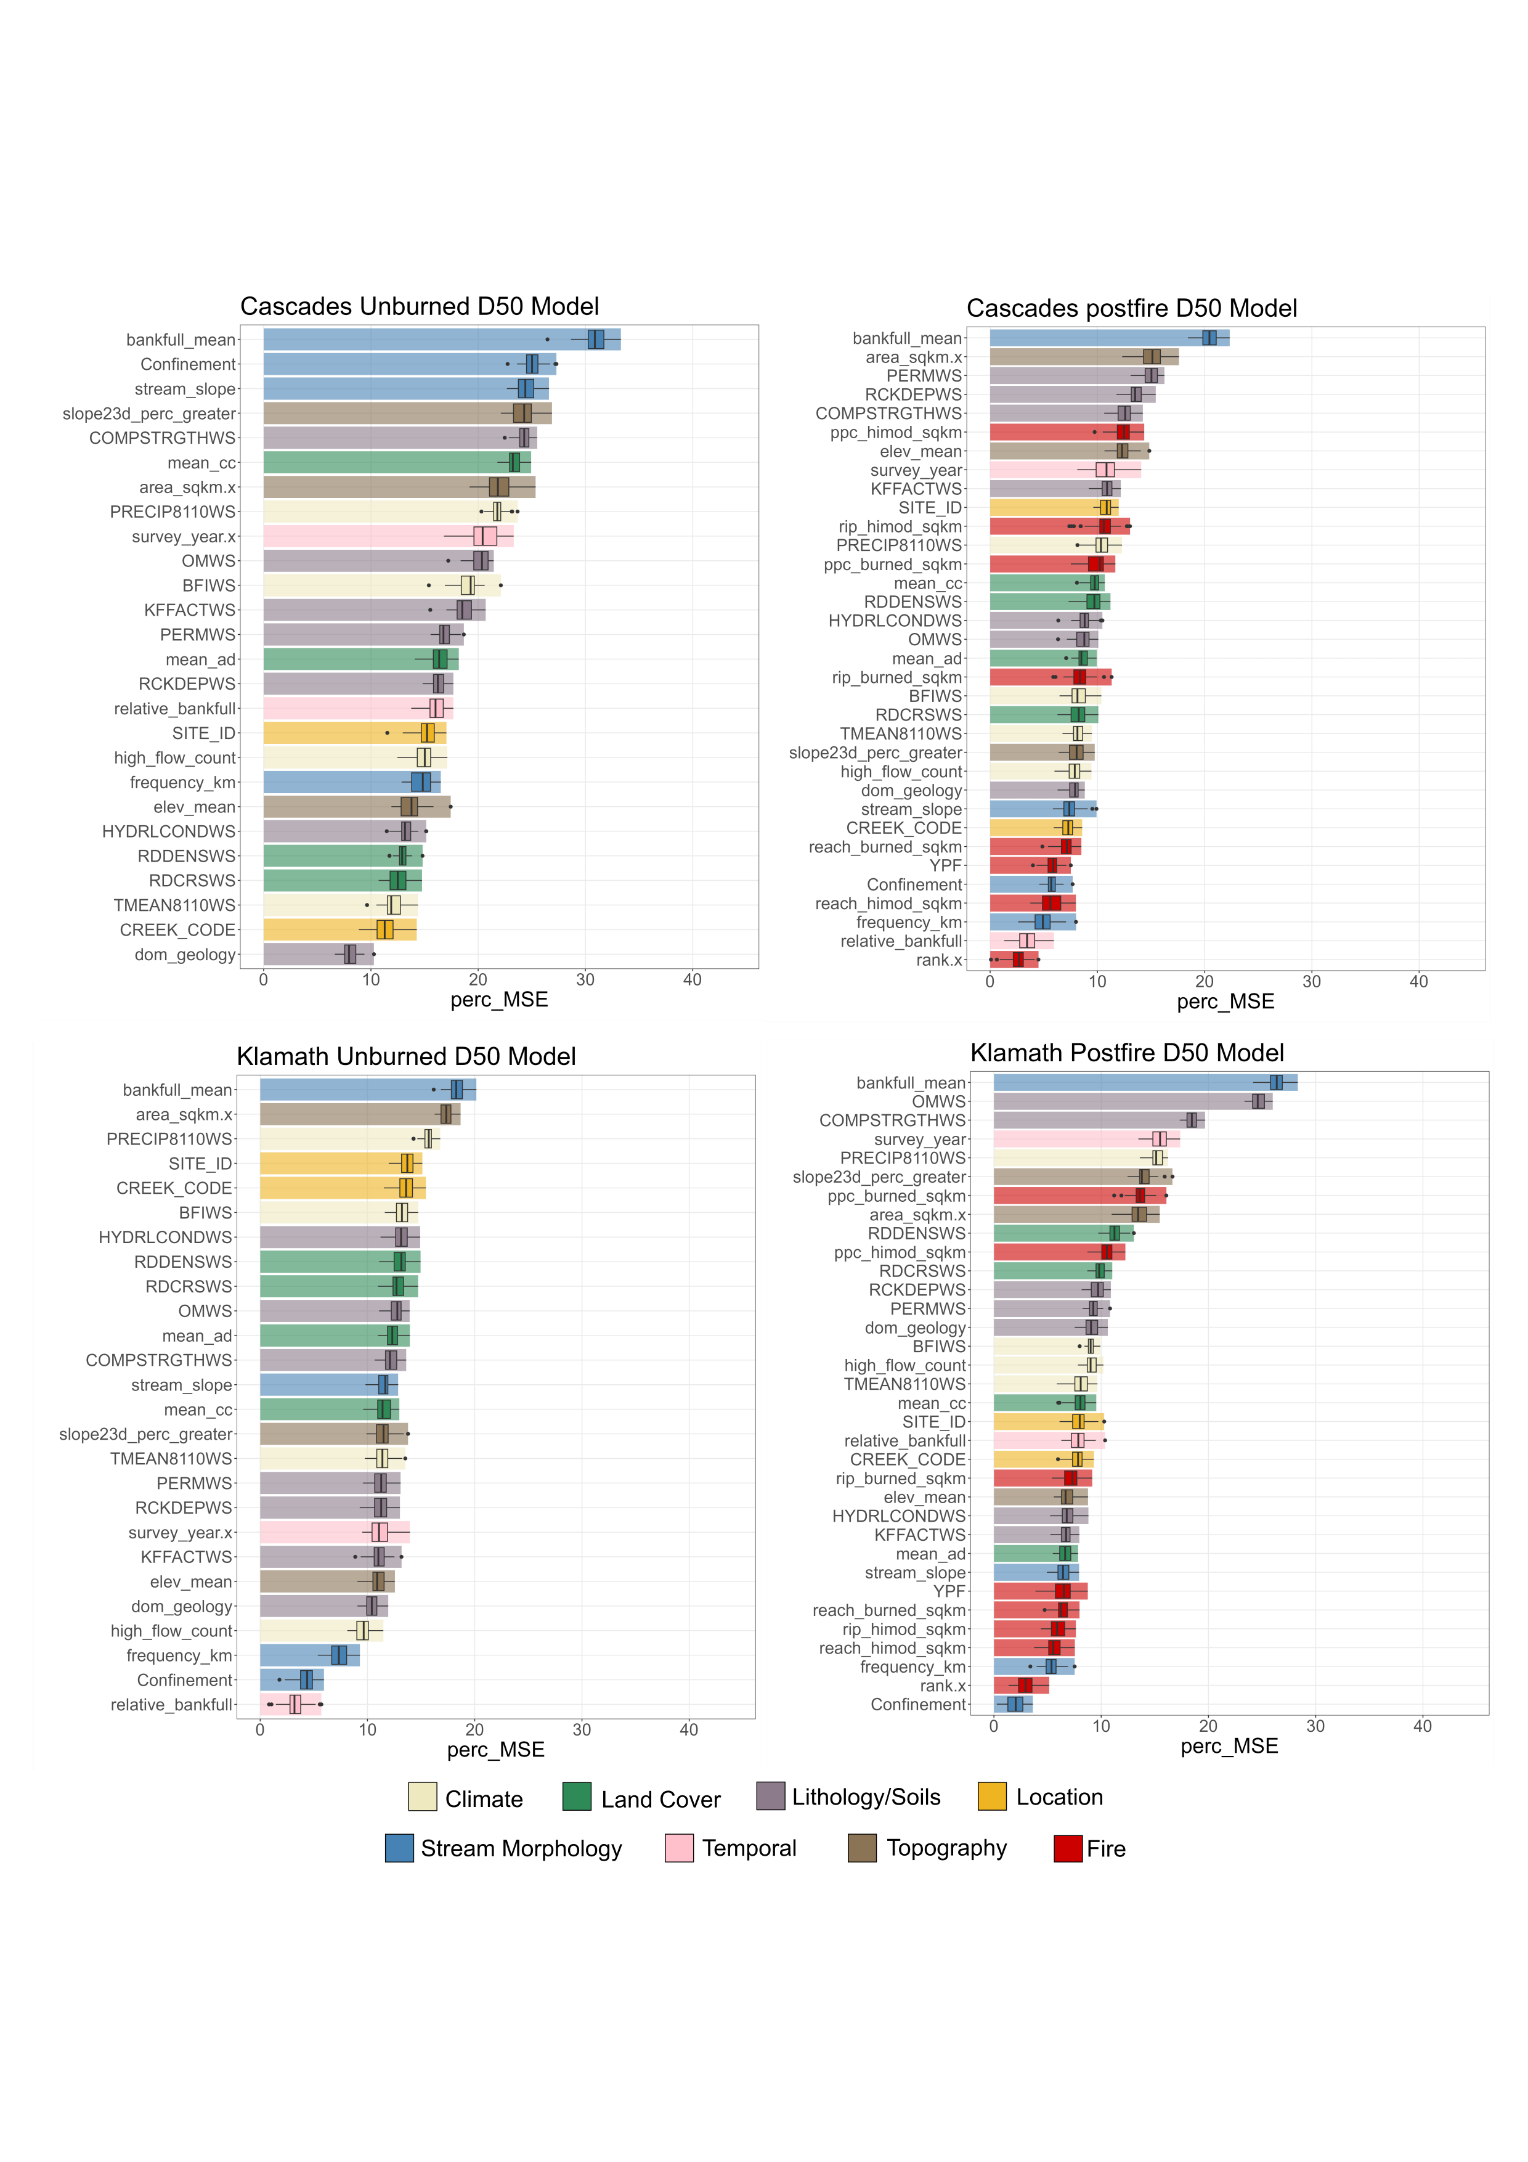


Figure 2. Full variable importance plots for the Unburned and Post-fire D50 models. This Figure complements Figure 4 in the text. Boxplots summarize the importance output from 50 model runs. Variable Important plot for the Unburned D50 model that was trained using solely unburned and pre-fire data for the Cascades (upper left) and Klamath (lower left) regions. Variable Important plot for the Post-fire D50 model that was trained using solely postfire data for the Cascades (upper right) and Klamath (bottom right) regions.

APPENDIX D. Partial Dependence Plots for the top ten most important variables for the Unburned and Post-fire Percent Fines models.


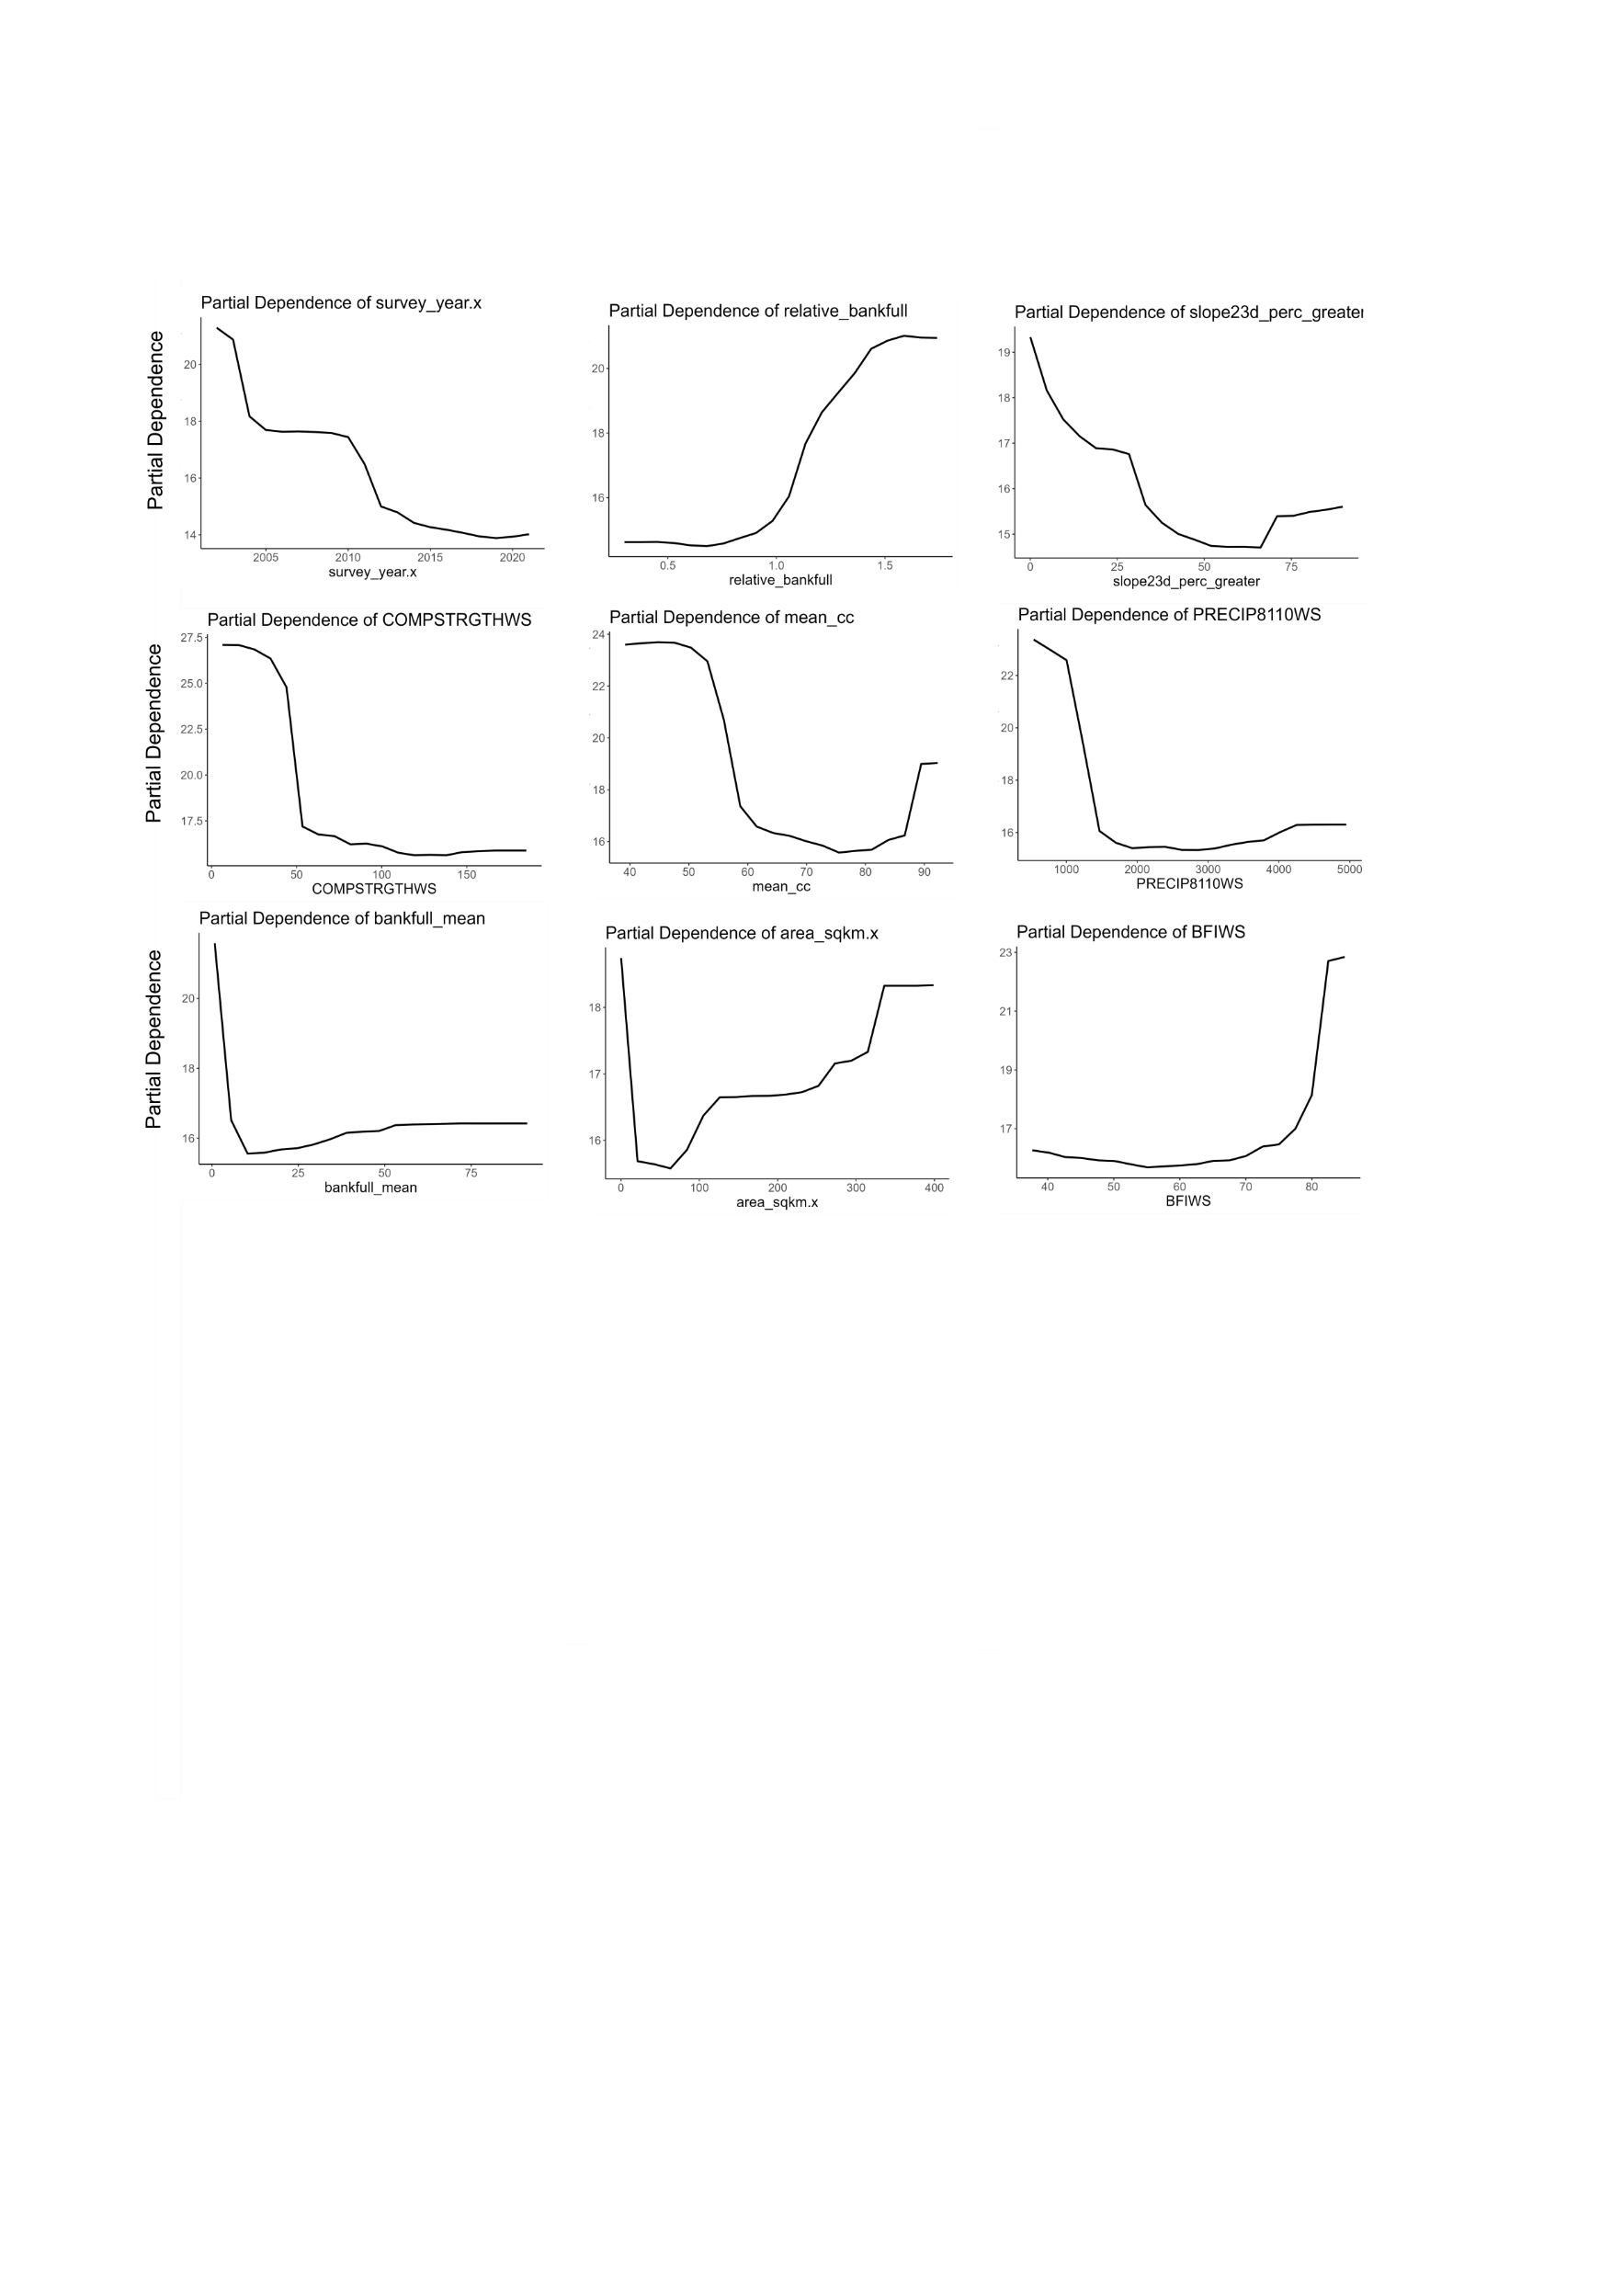


Figure 3. Partial dependence plots for the nine most important variables for the Cascades Unburned Percent Fines model. One of the top ten most important variables was categorical and therefore removed from this figure. This figure corresponds to Figure 3A in the text.


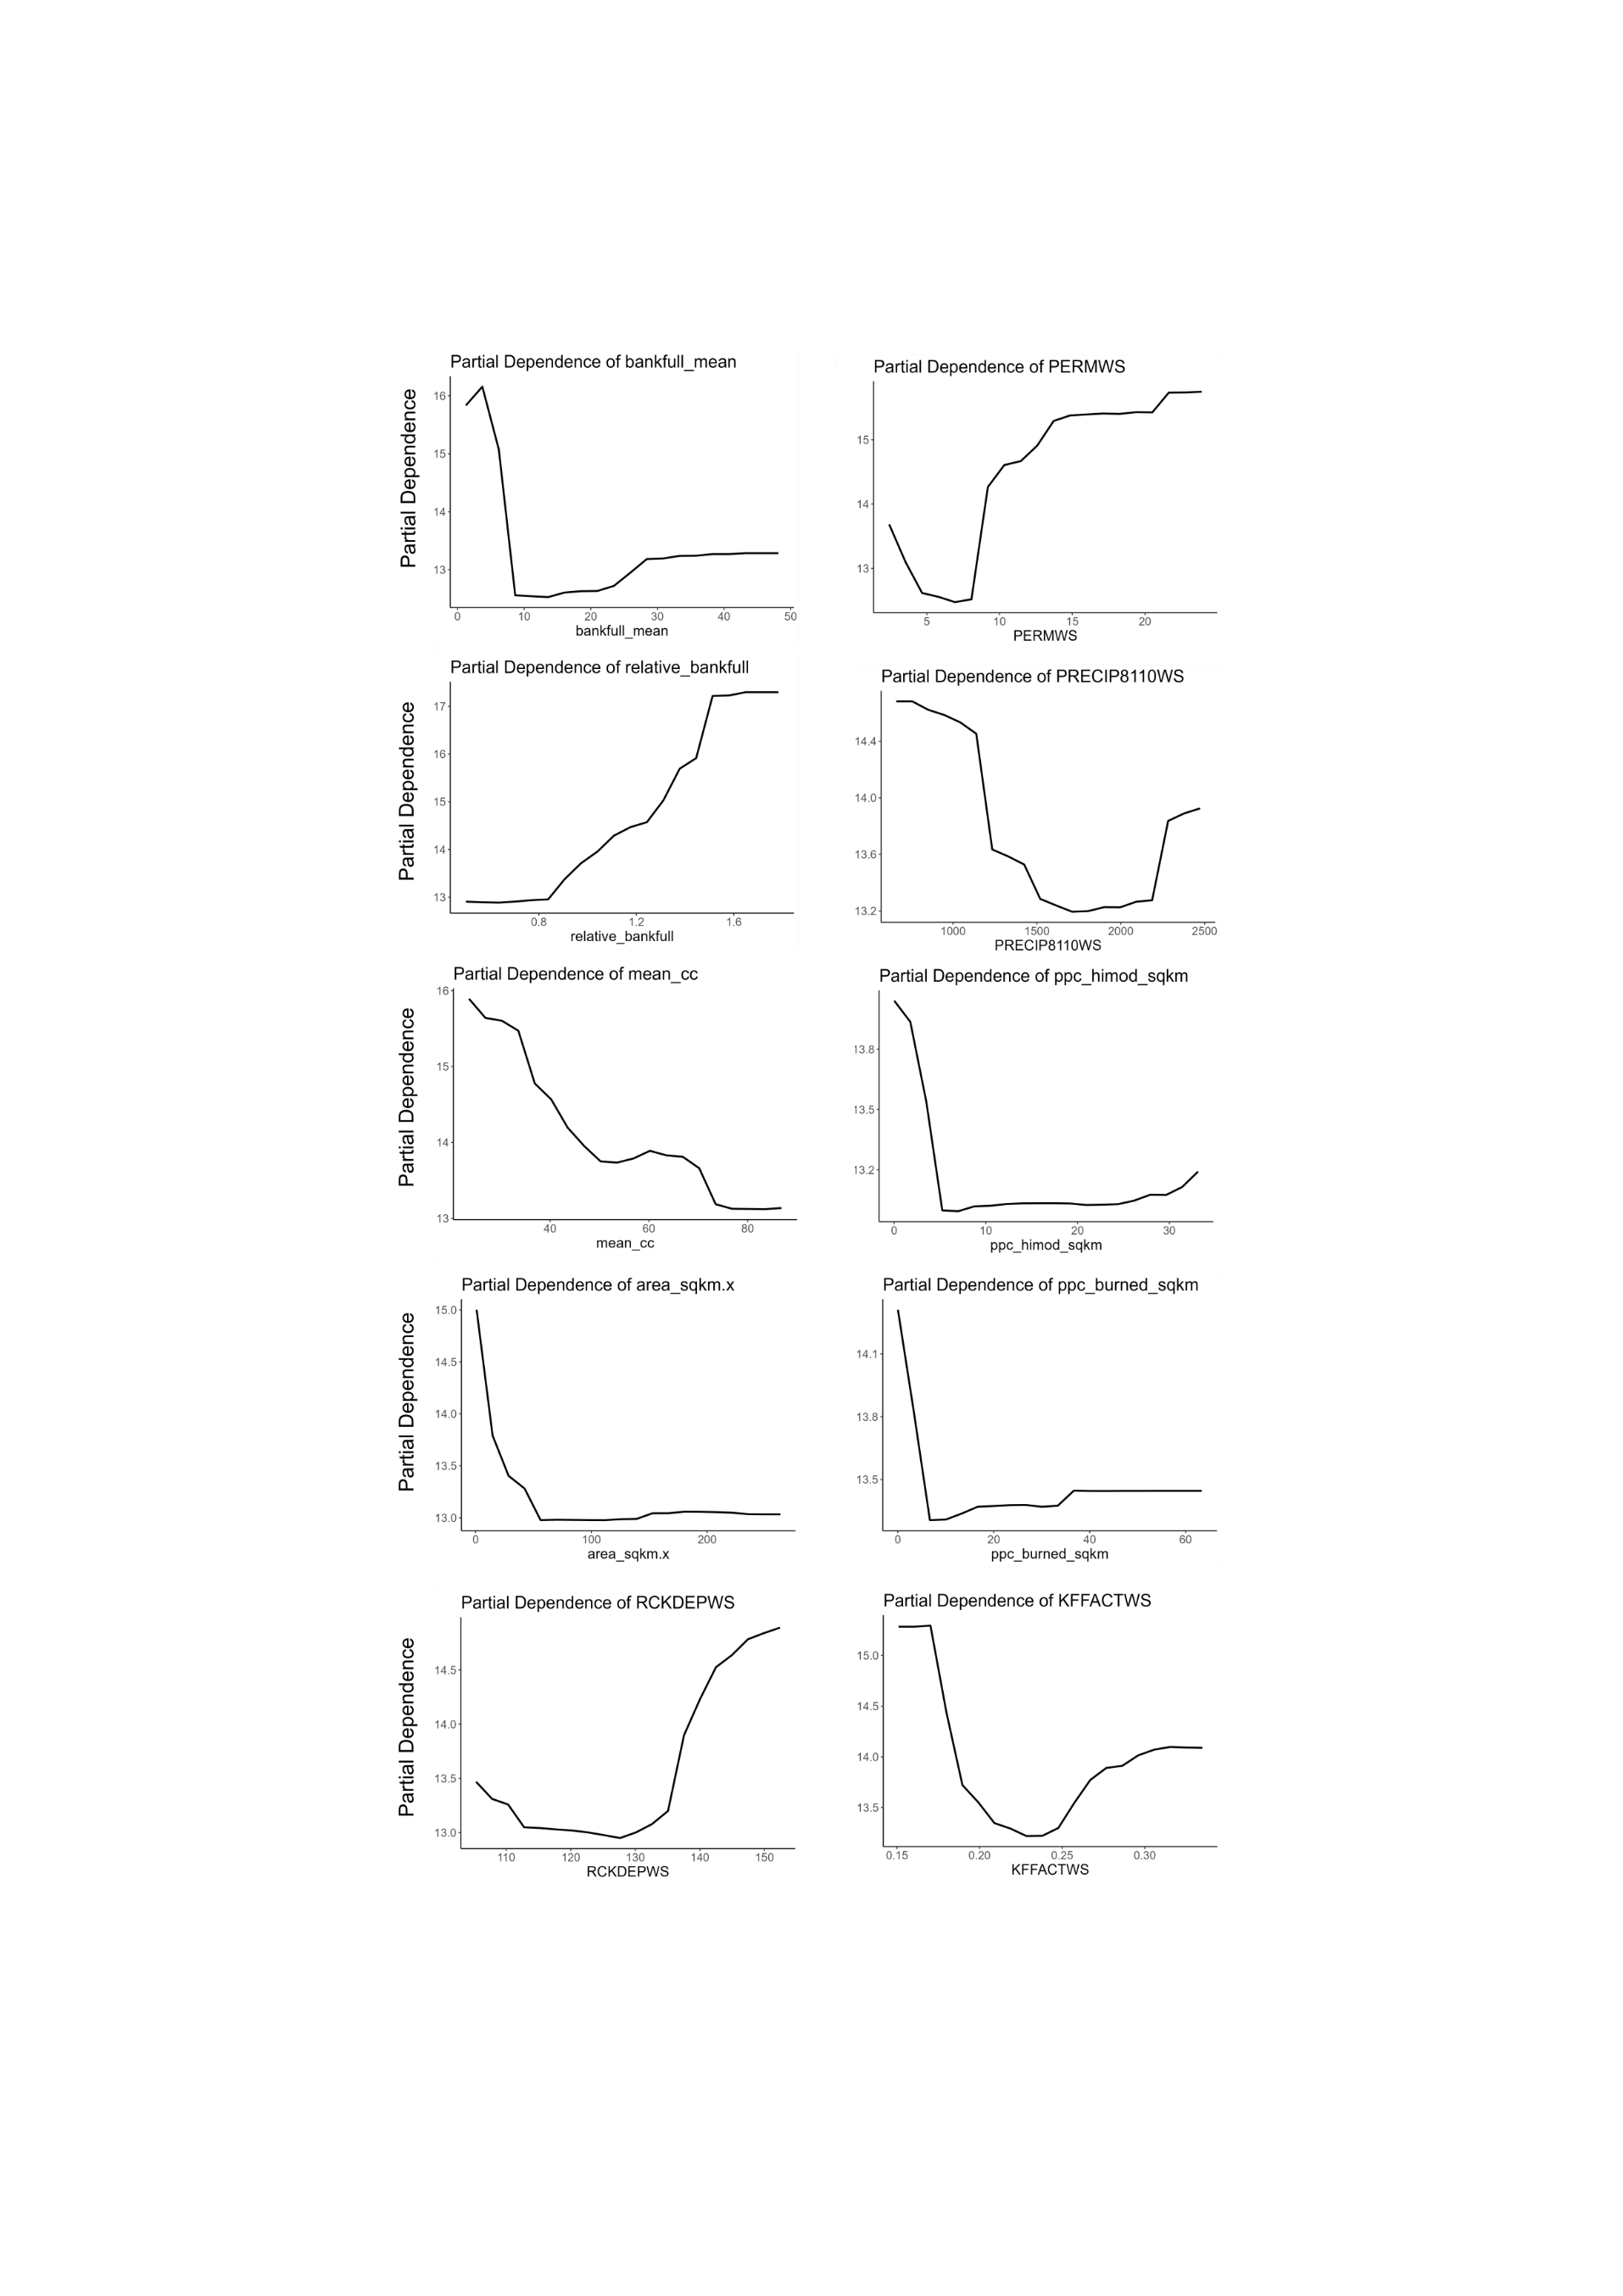


Figure 4. Partial dependence plots for the ten most important variables for the Cascades Post-fire Percent Fines model. This figure corresponds to Figure 3B in the text.


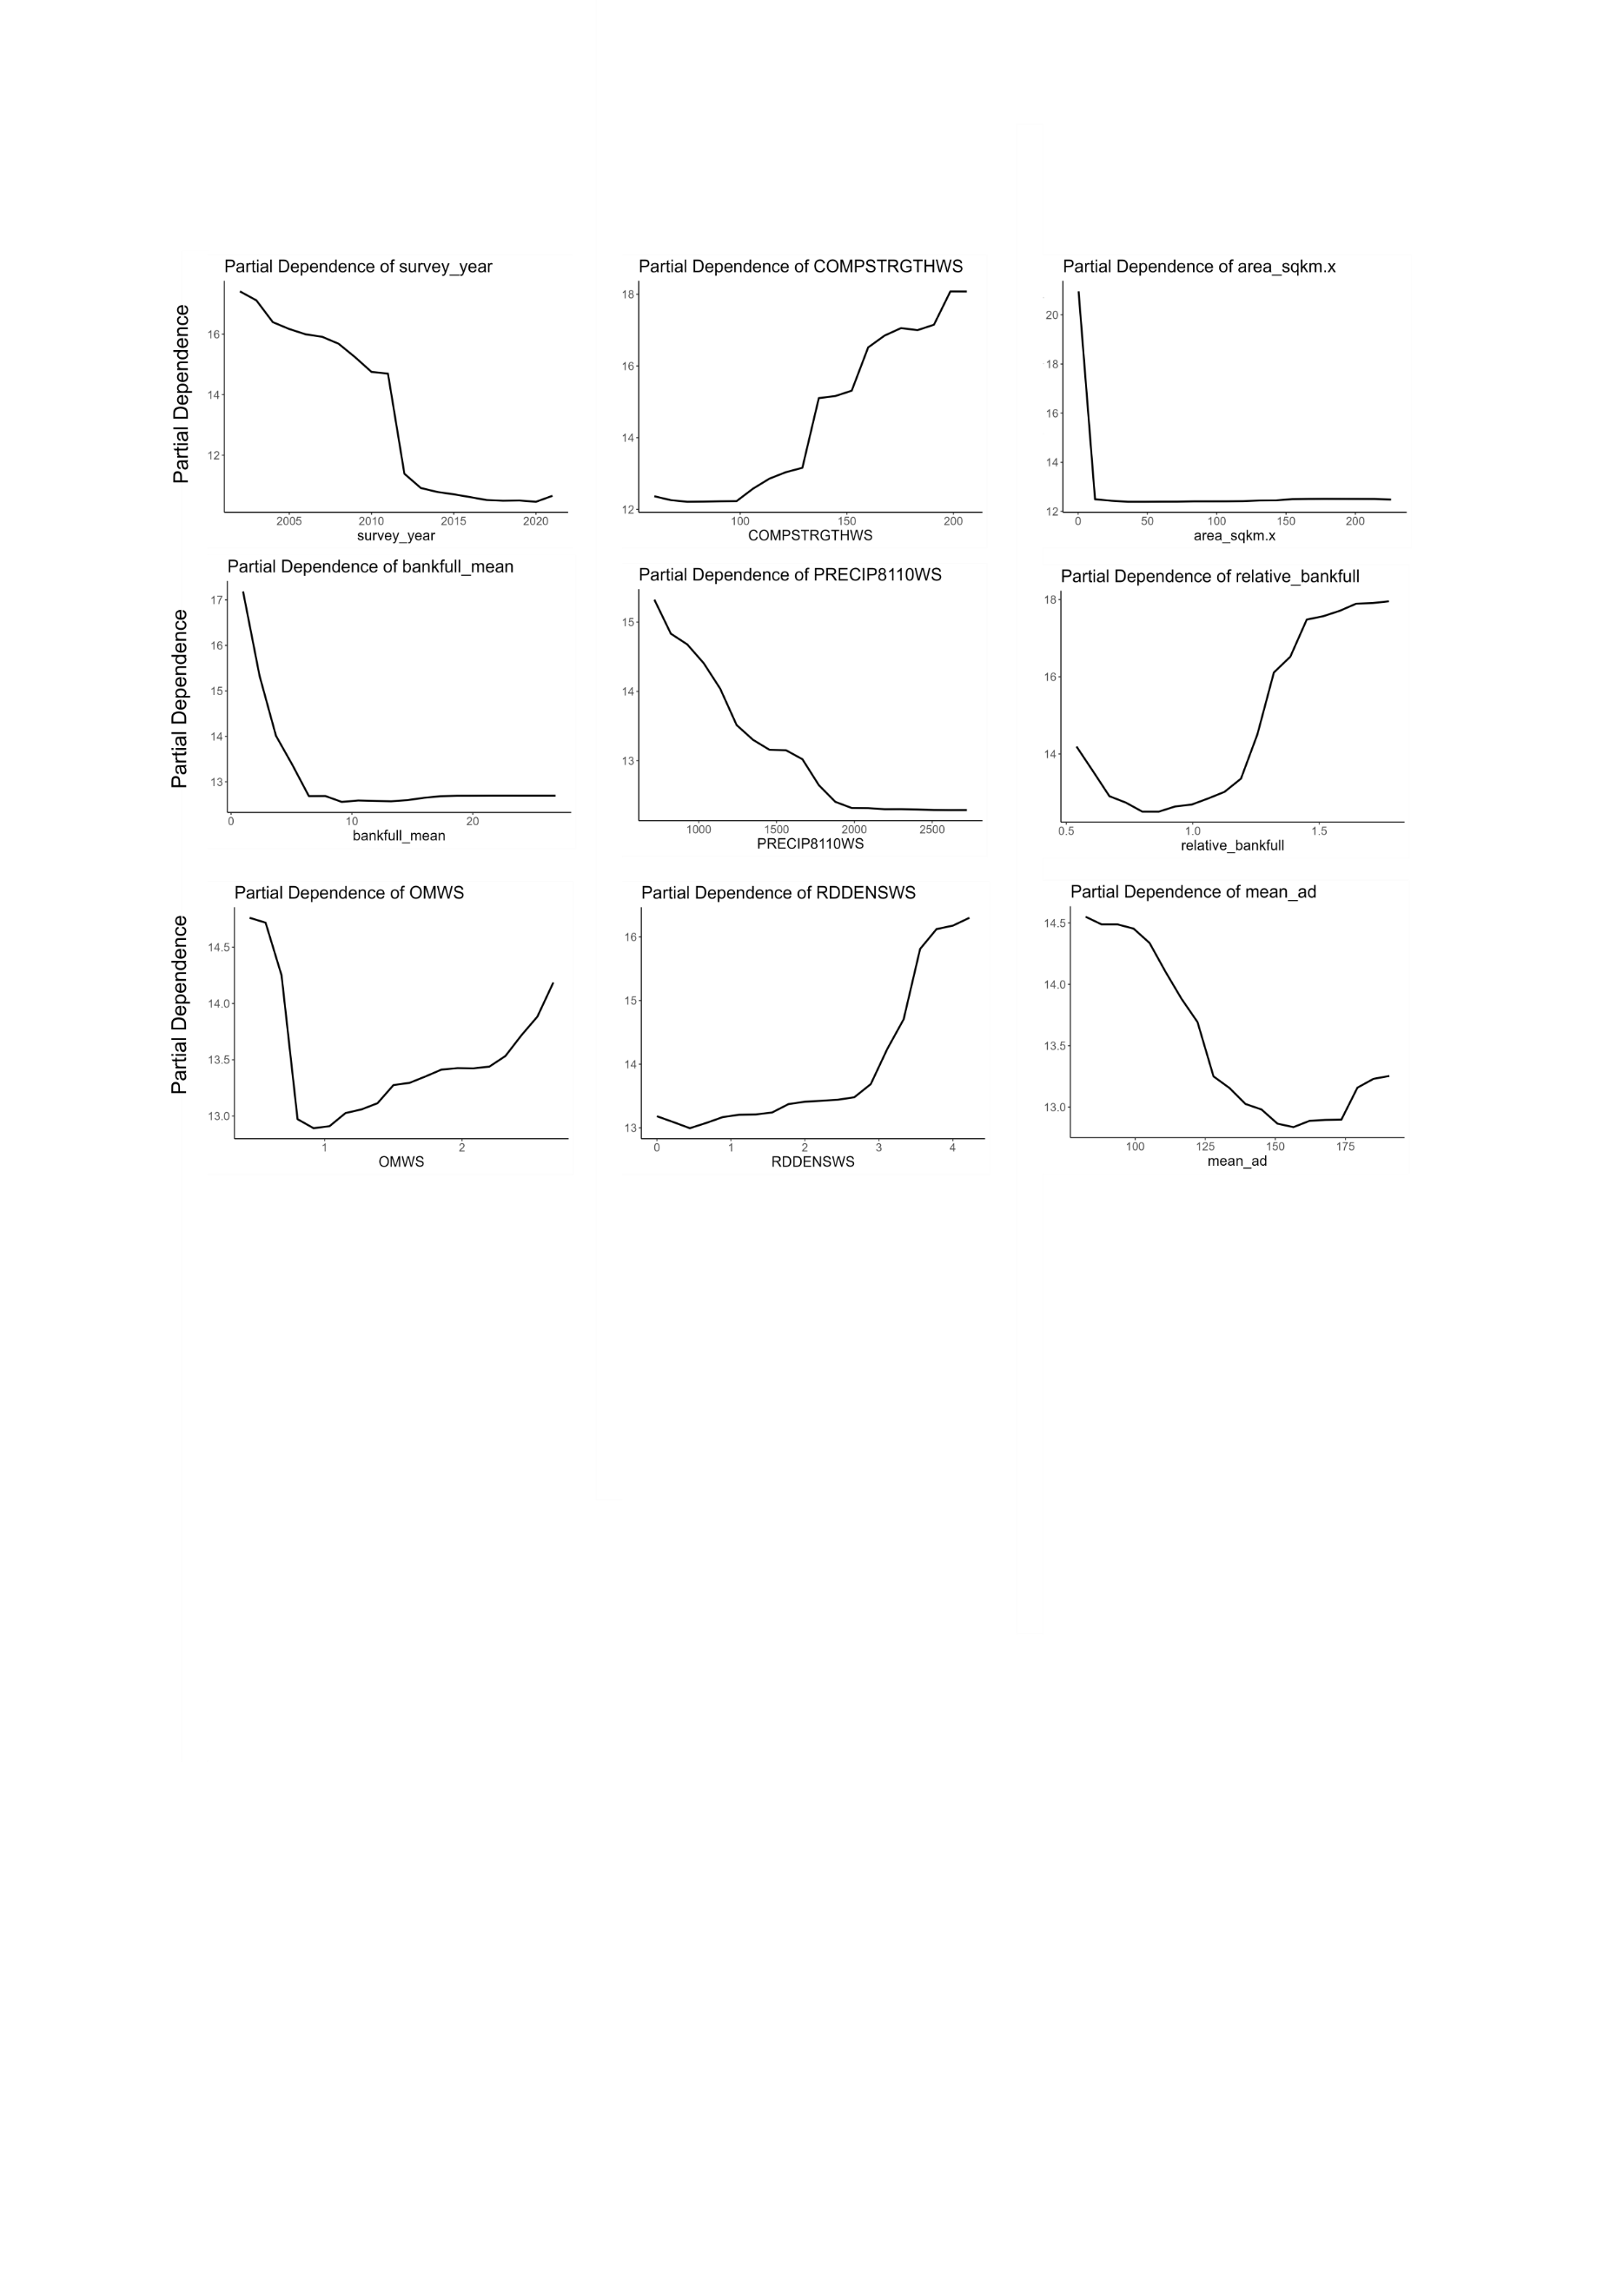


Figure 5. Partial dependence plots for the nine most important variables for the Klamath Unburned Percent Fines model. One of the top ten most important variables was categorical and therefore removed from this figure. This figure corresponds to Figure 3A in the text.


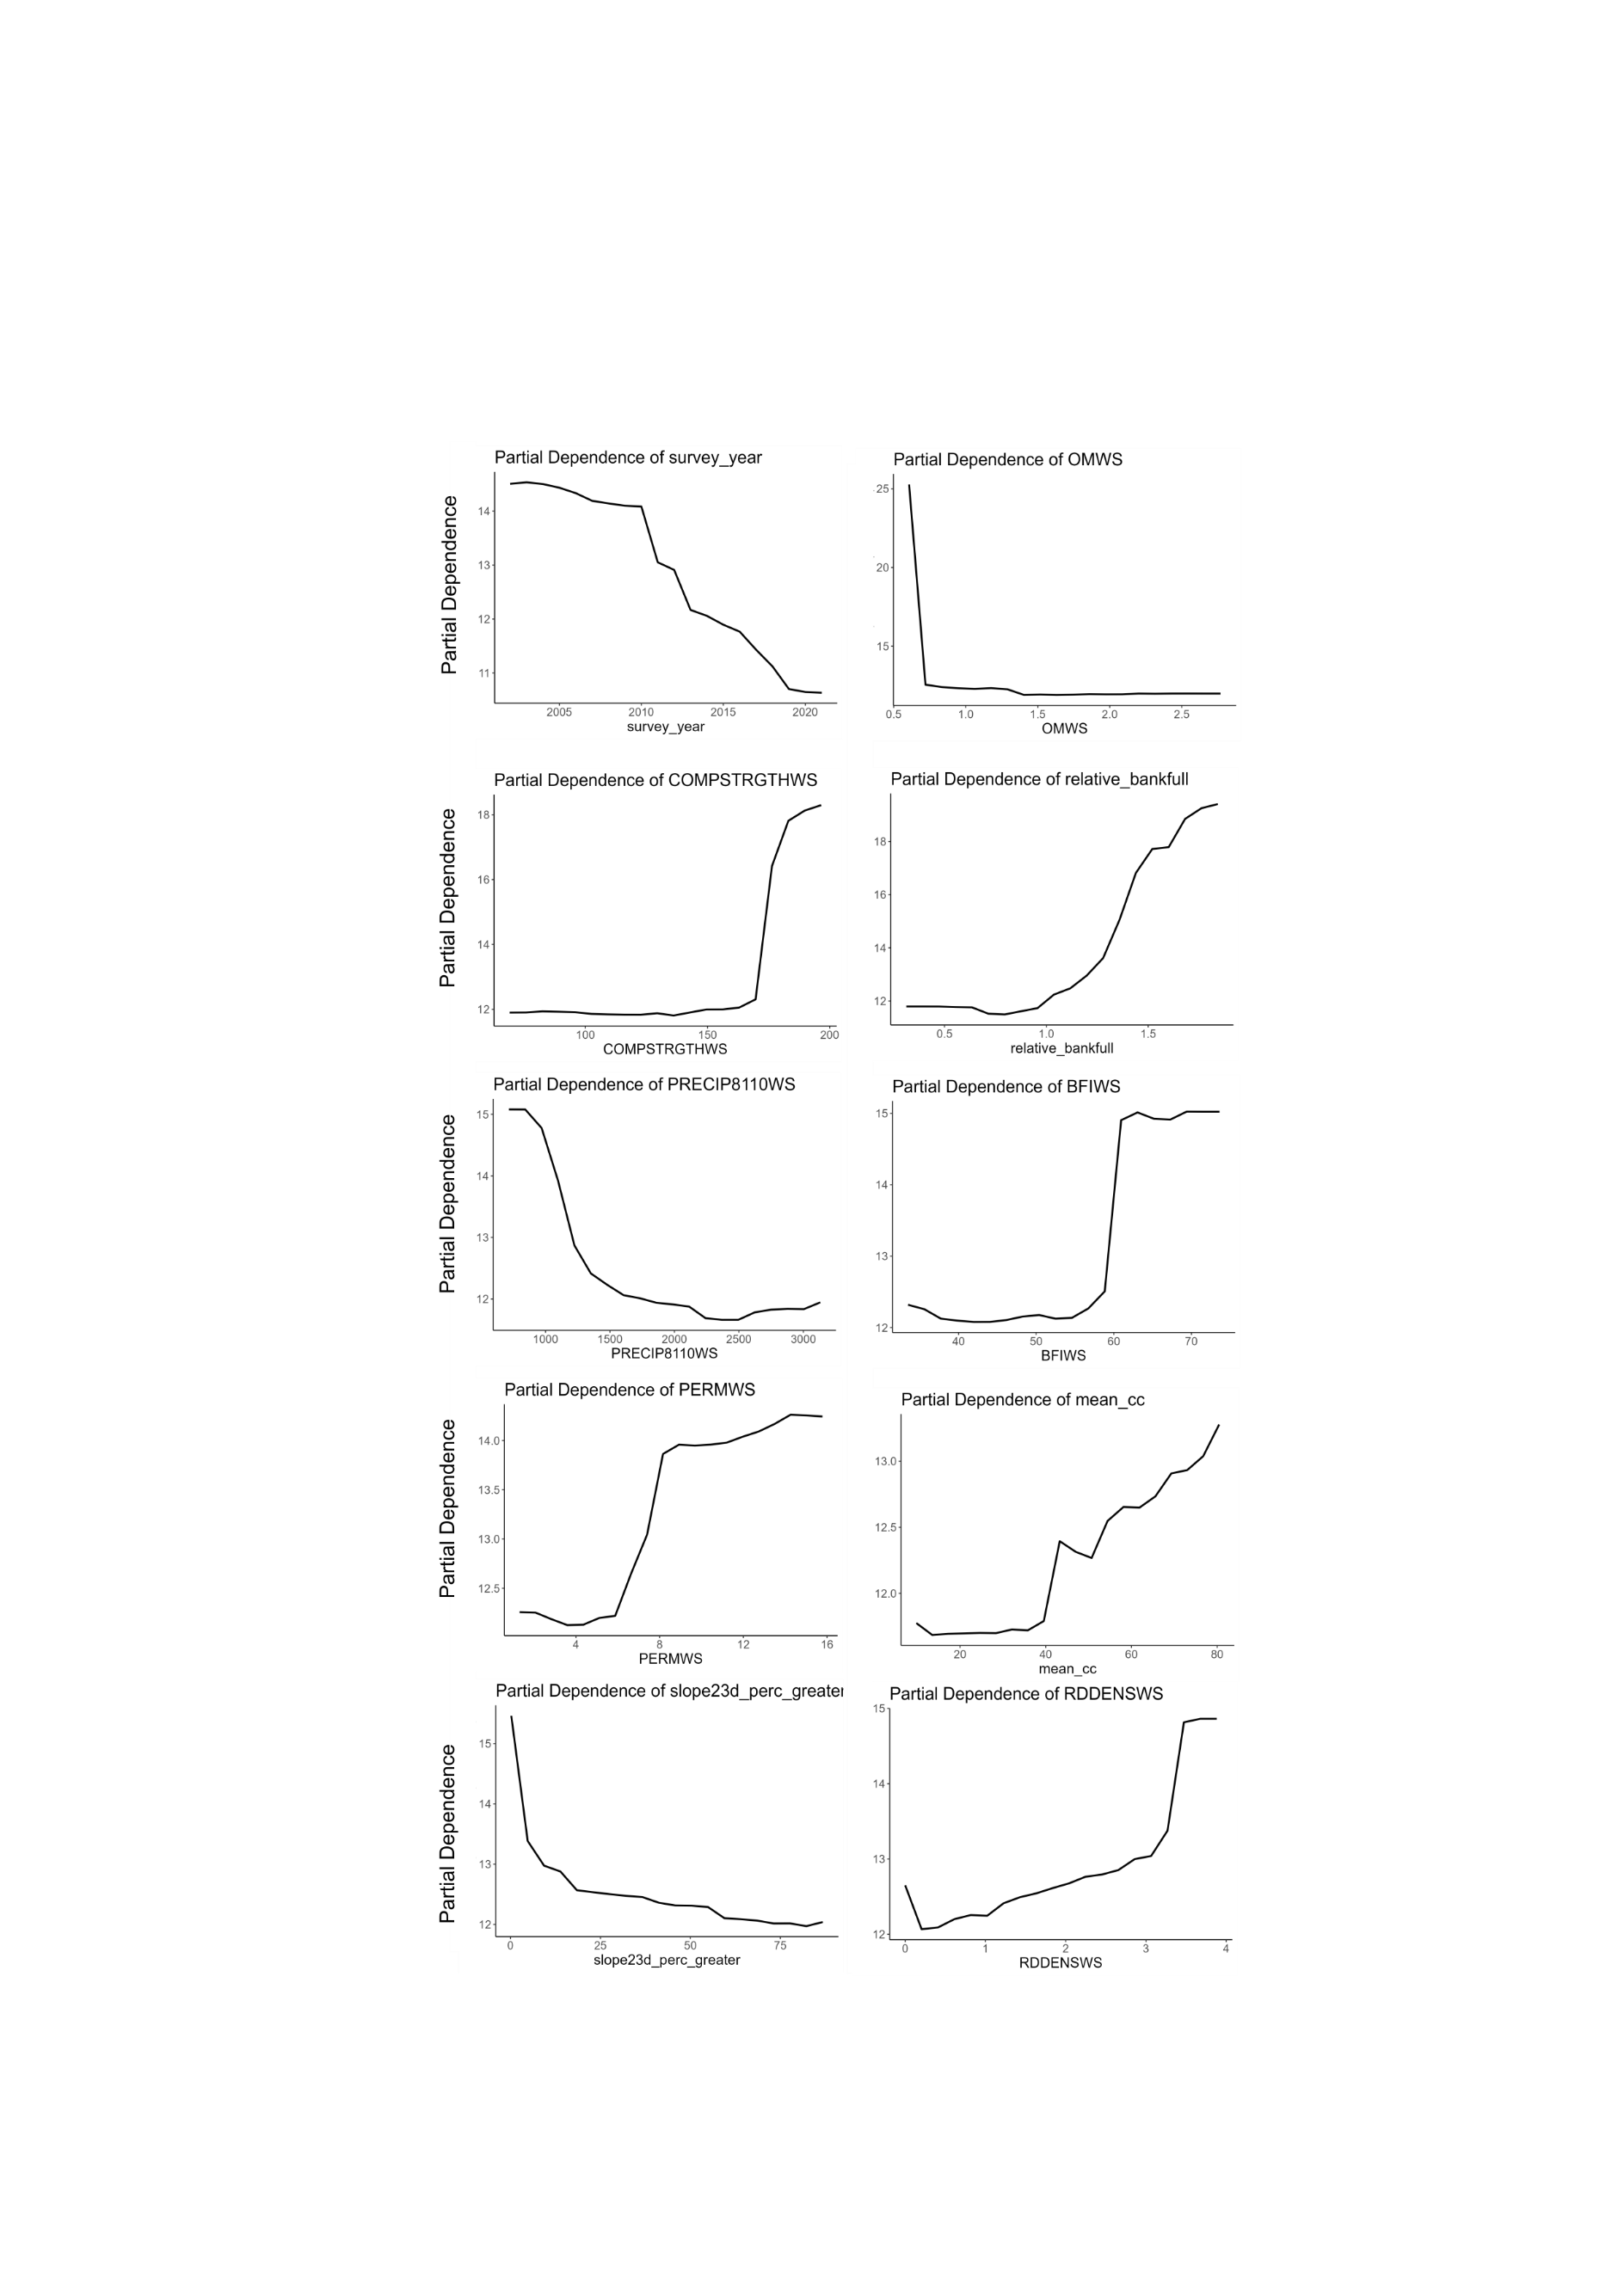


Figure 6. Partial dependence plots for the ten most important variables for the Klamath Post-fire Percent Fines model. This figure corresponds to Figure 3B in the text.

APPENDIX E. Partial Dependence Plots for the top ten most important variables for the Unburned and Post-fire D50 models.


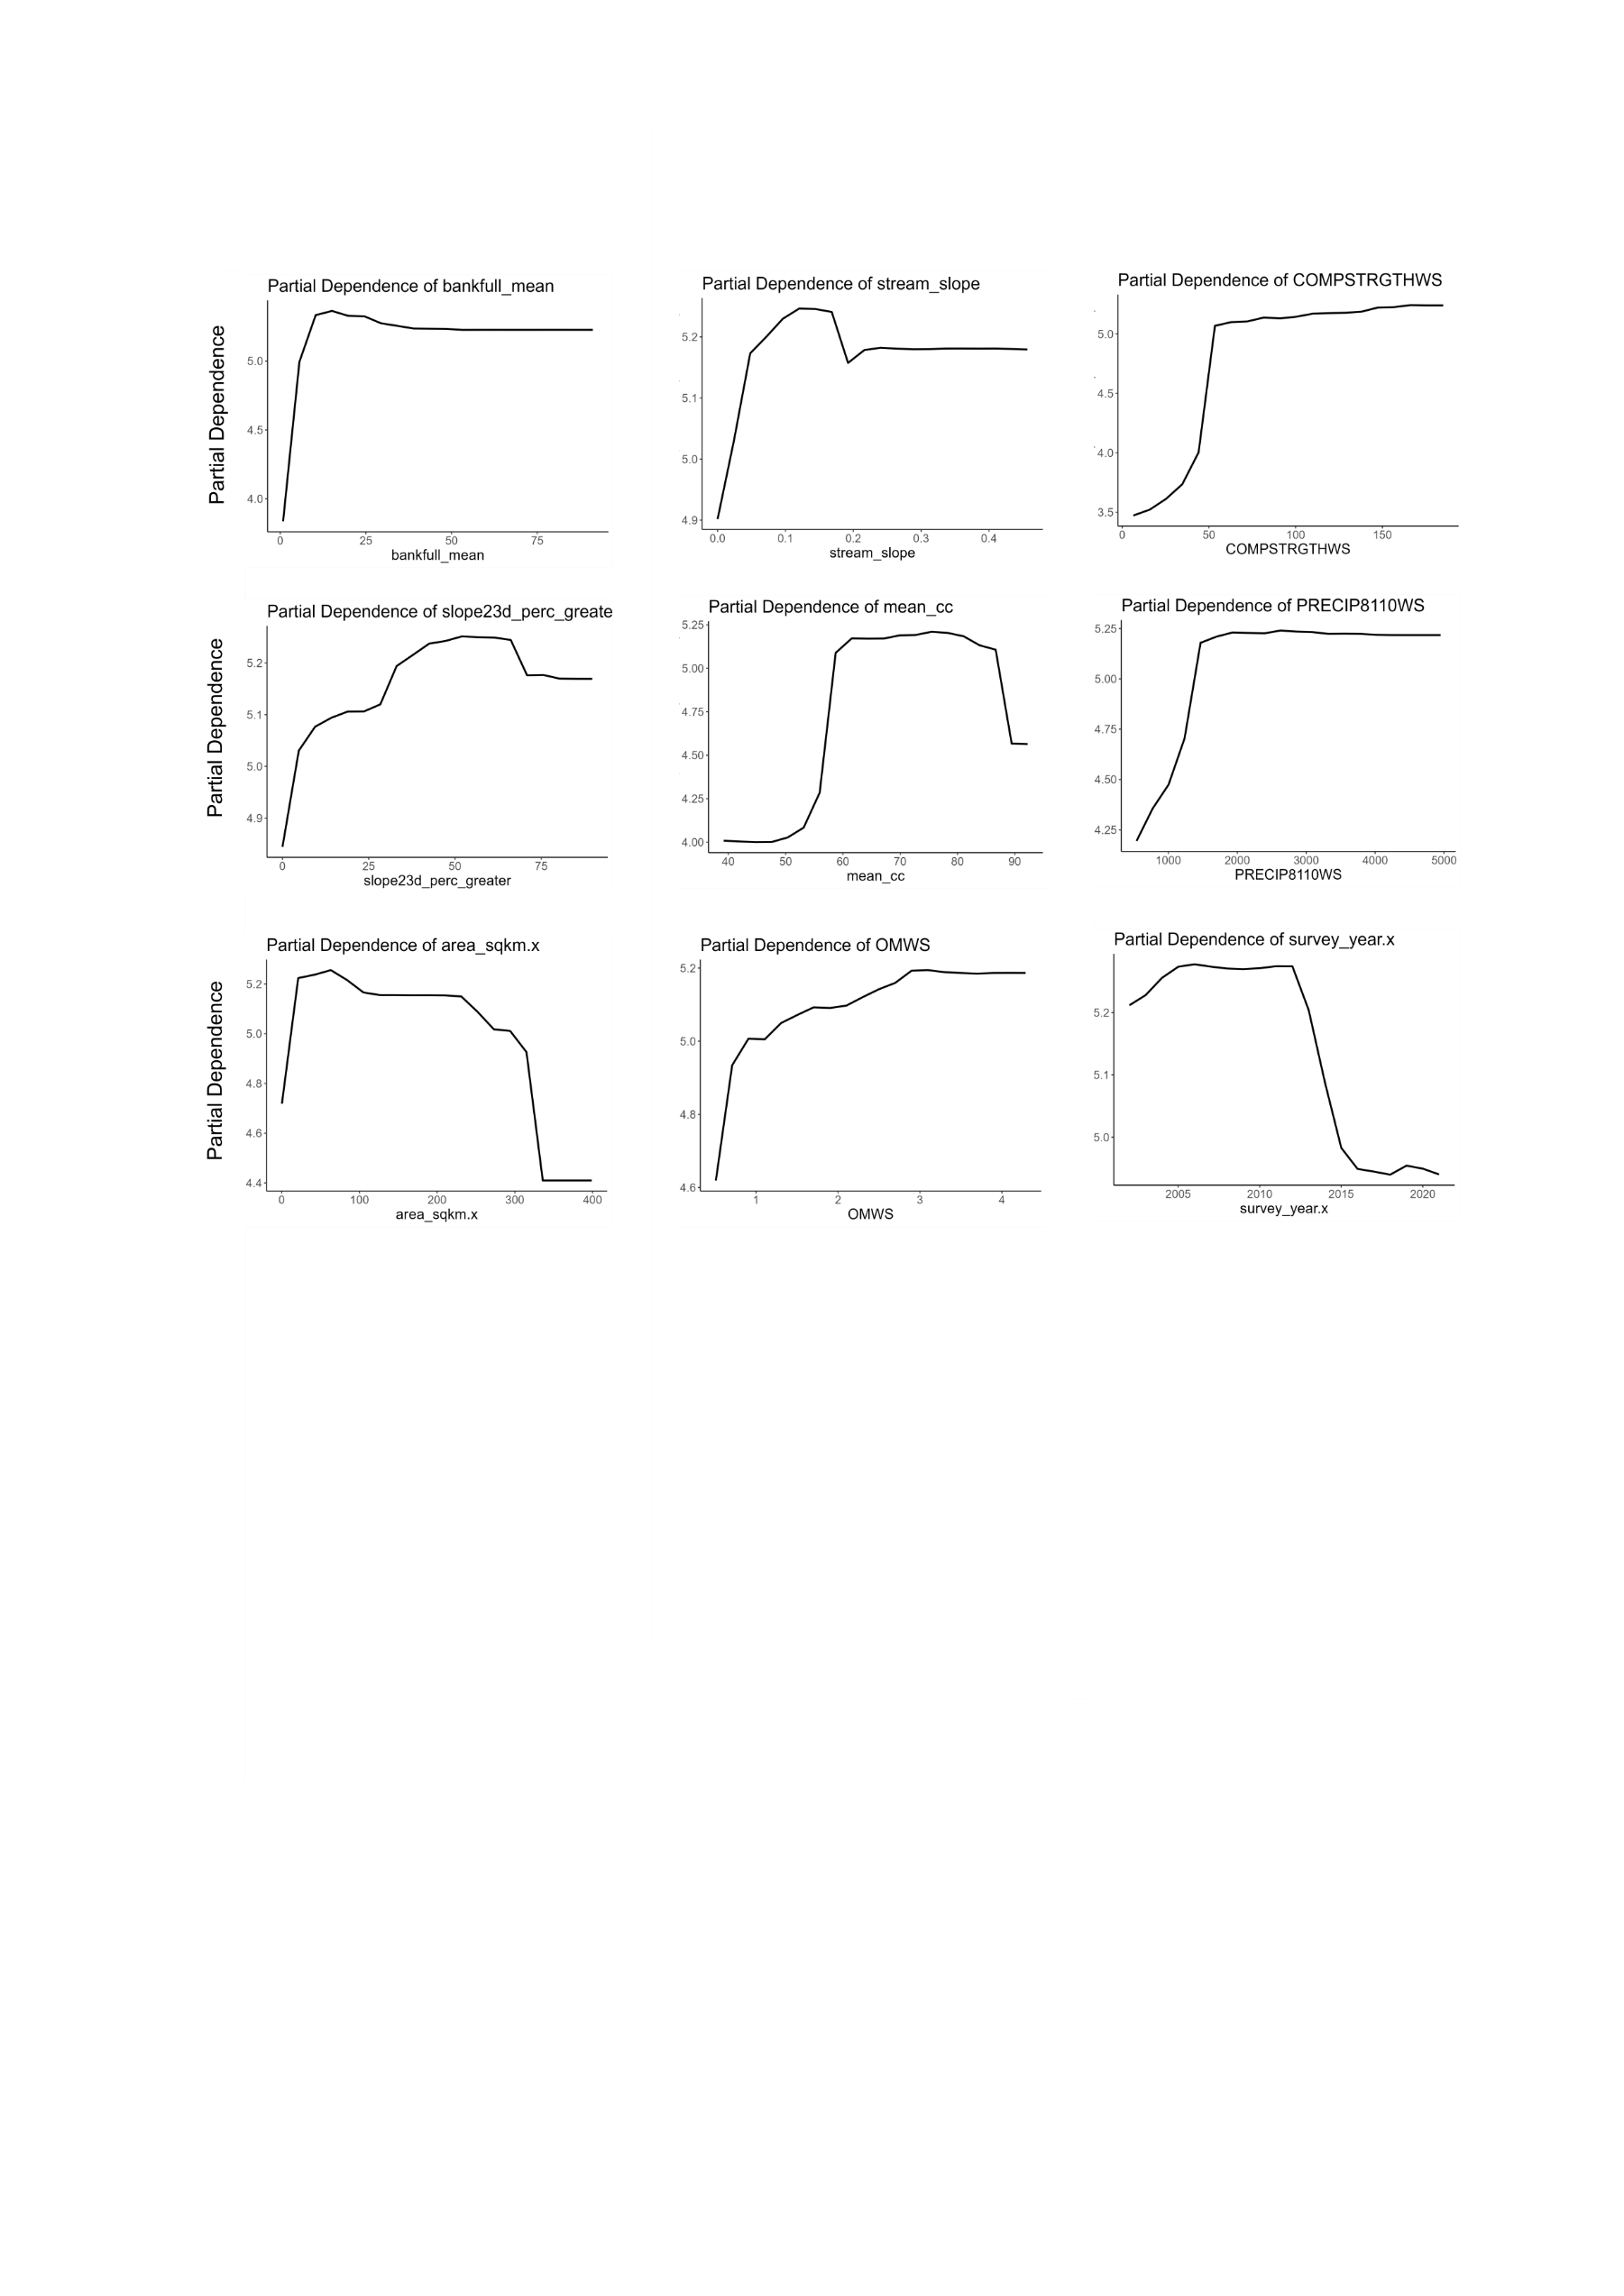


Figure 5. Partial dependence plots for the nine most important variables for the Cascades Unburned D50 model. One of the top ten most important variables was categorical and therefore removed from this figure. This figure corresponds to Figure 4A in the text.


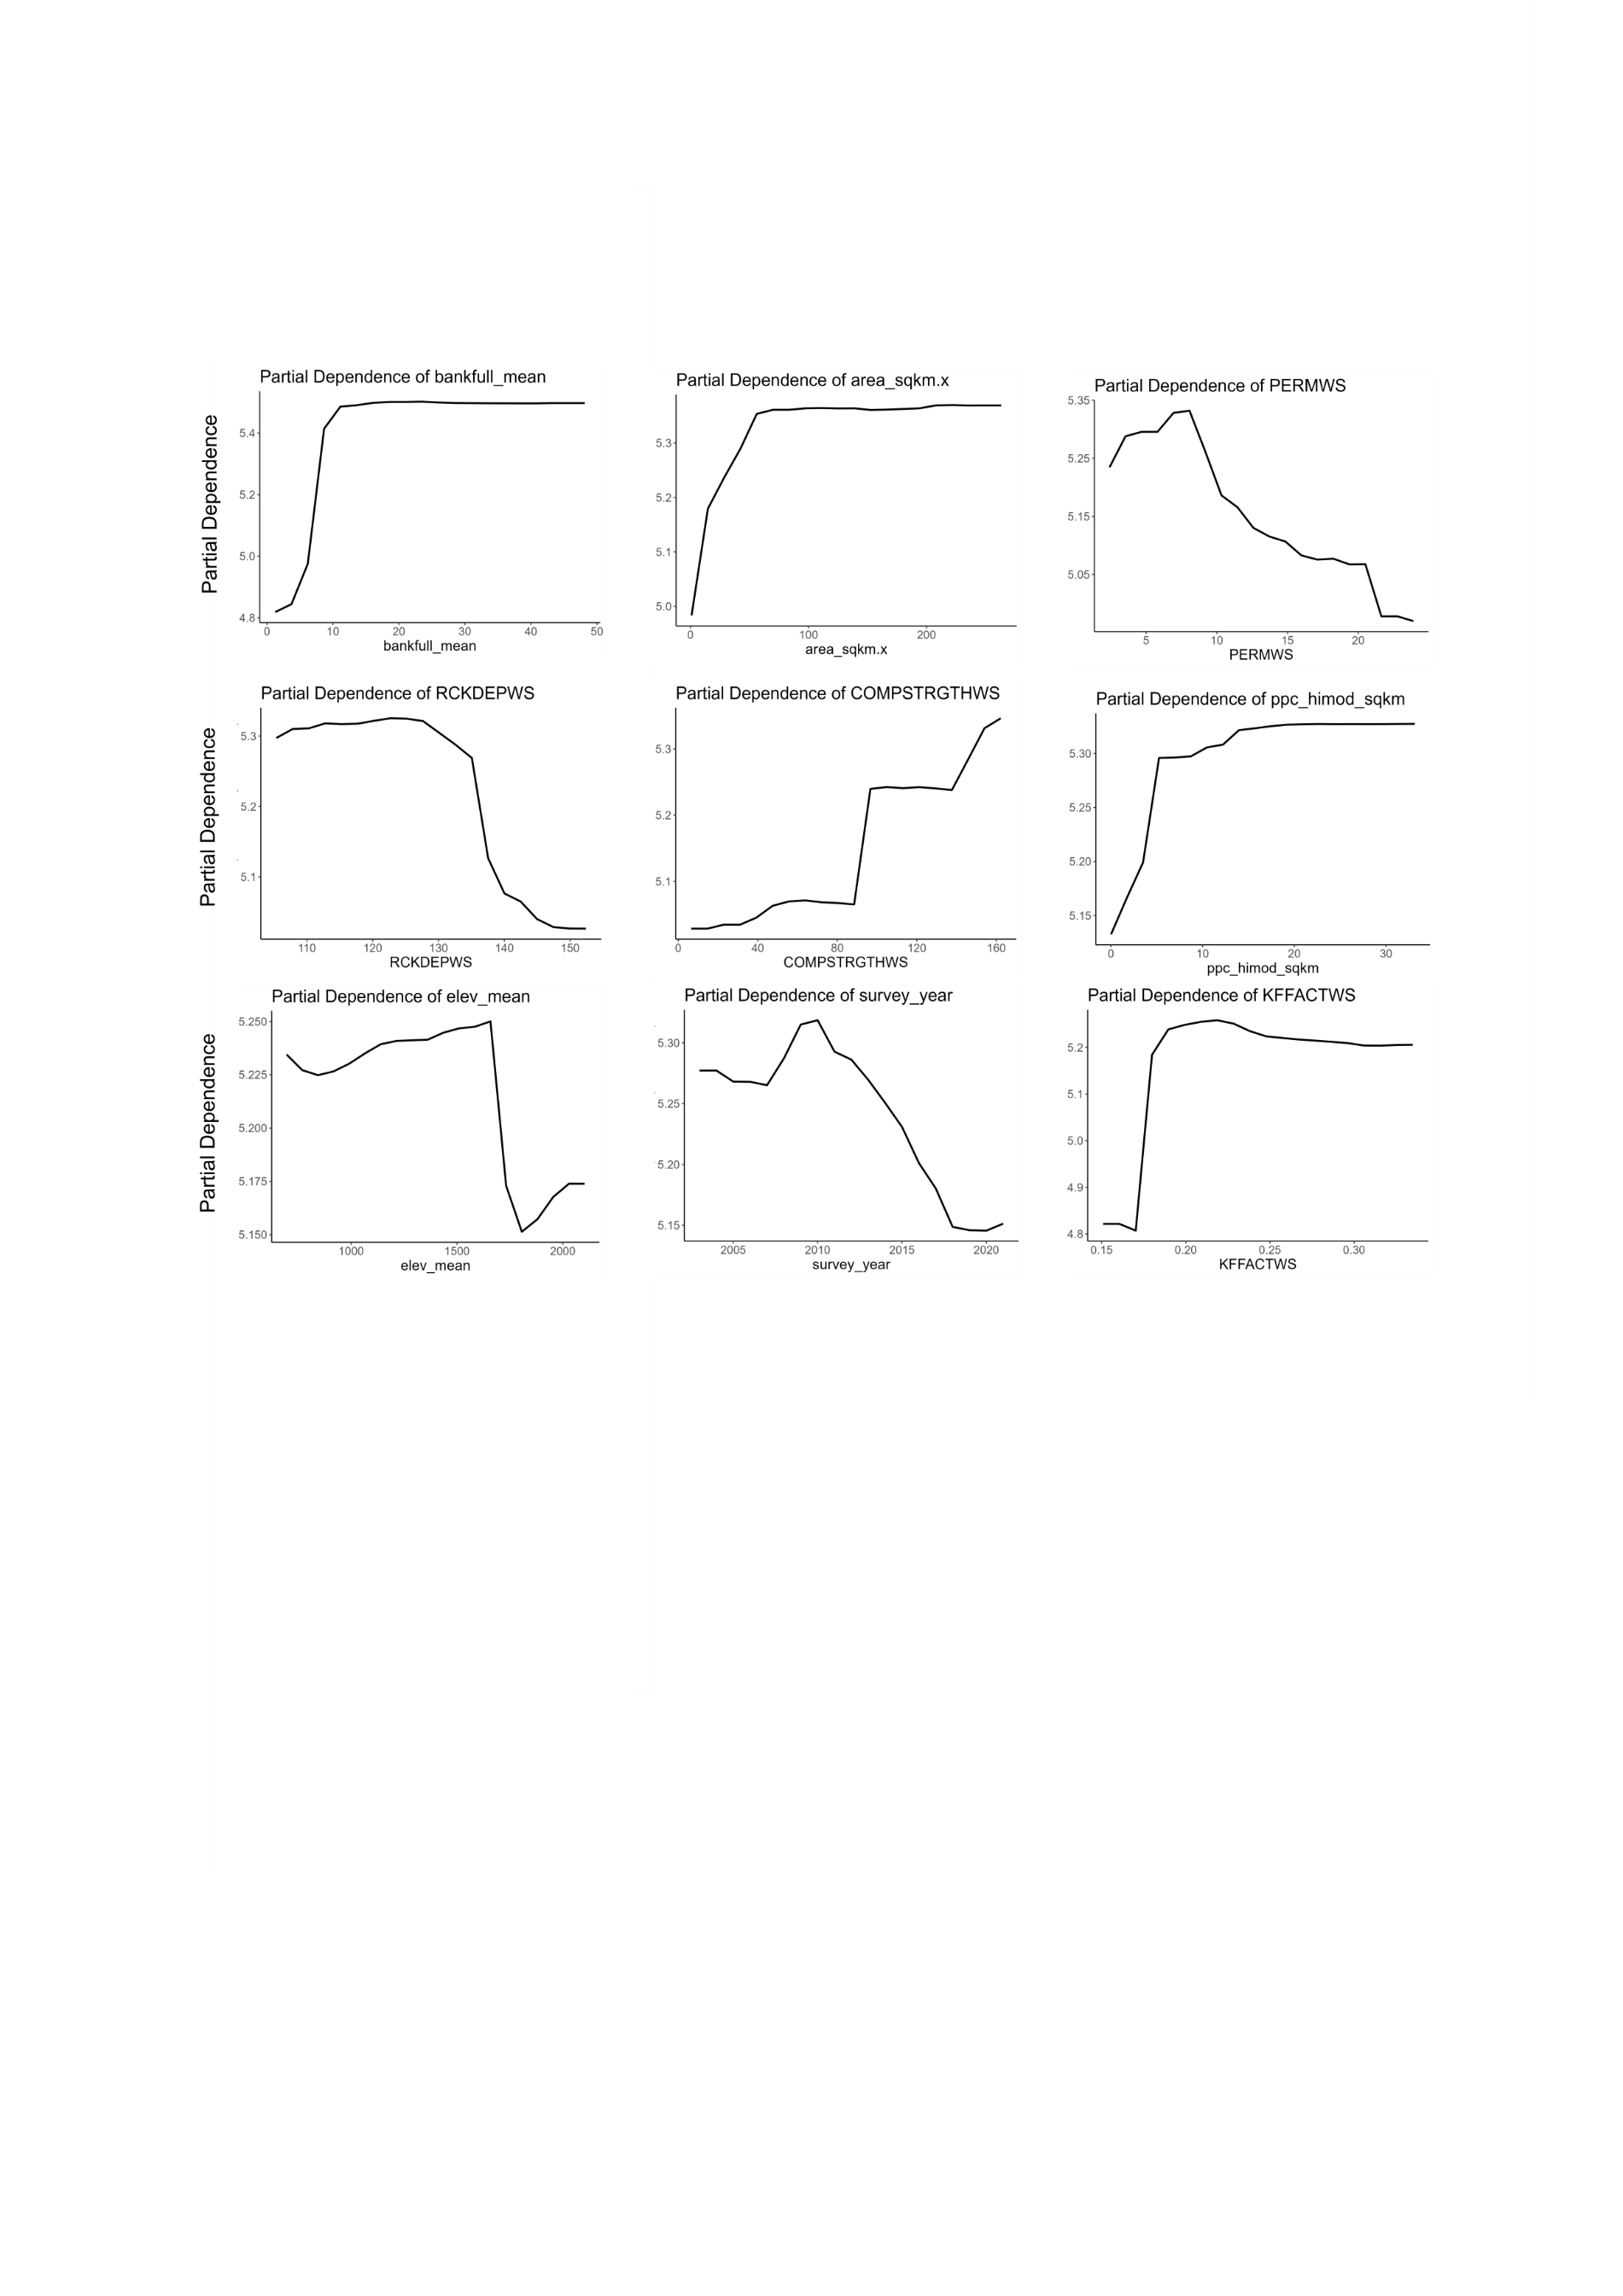


Figure 6. Partial dependence plots for the nine most important variables for the Cascades Post-fire D50 model. One of the top ten most important variables was categorical and therefore removed from this figure. This figure corresponds to Figure 4B in the text.


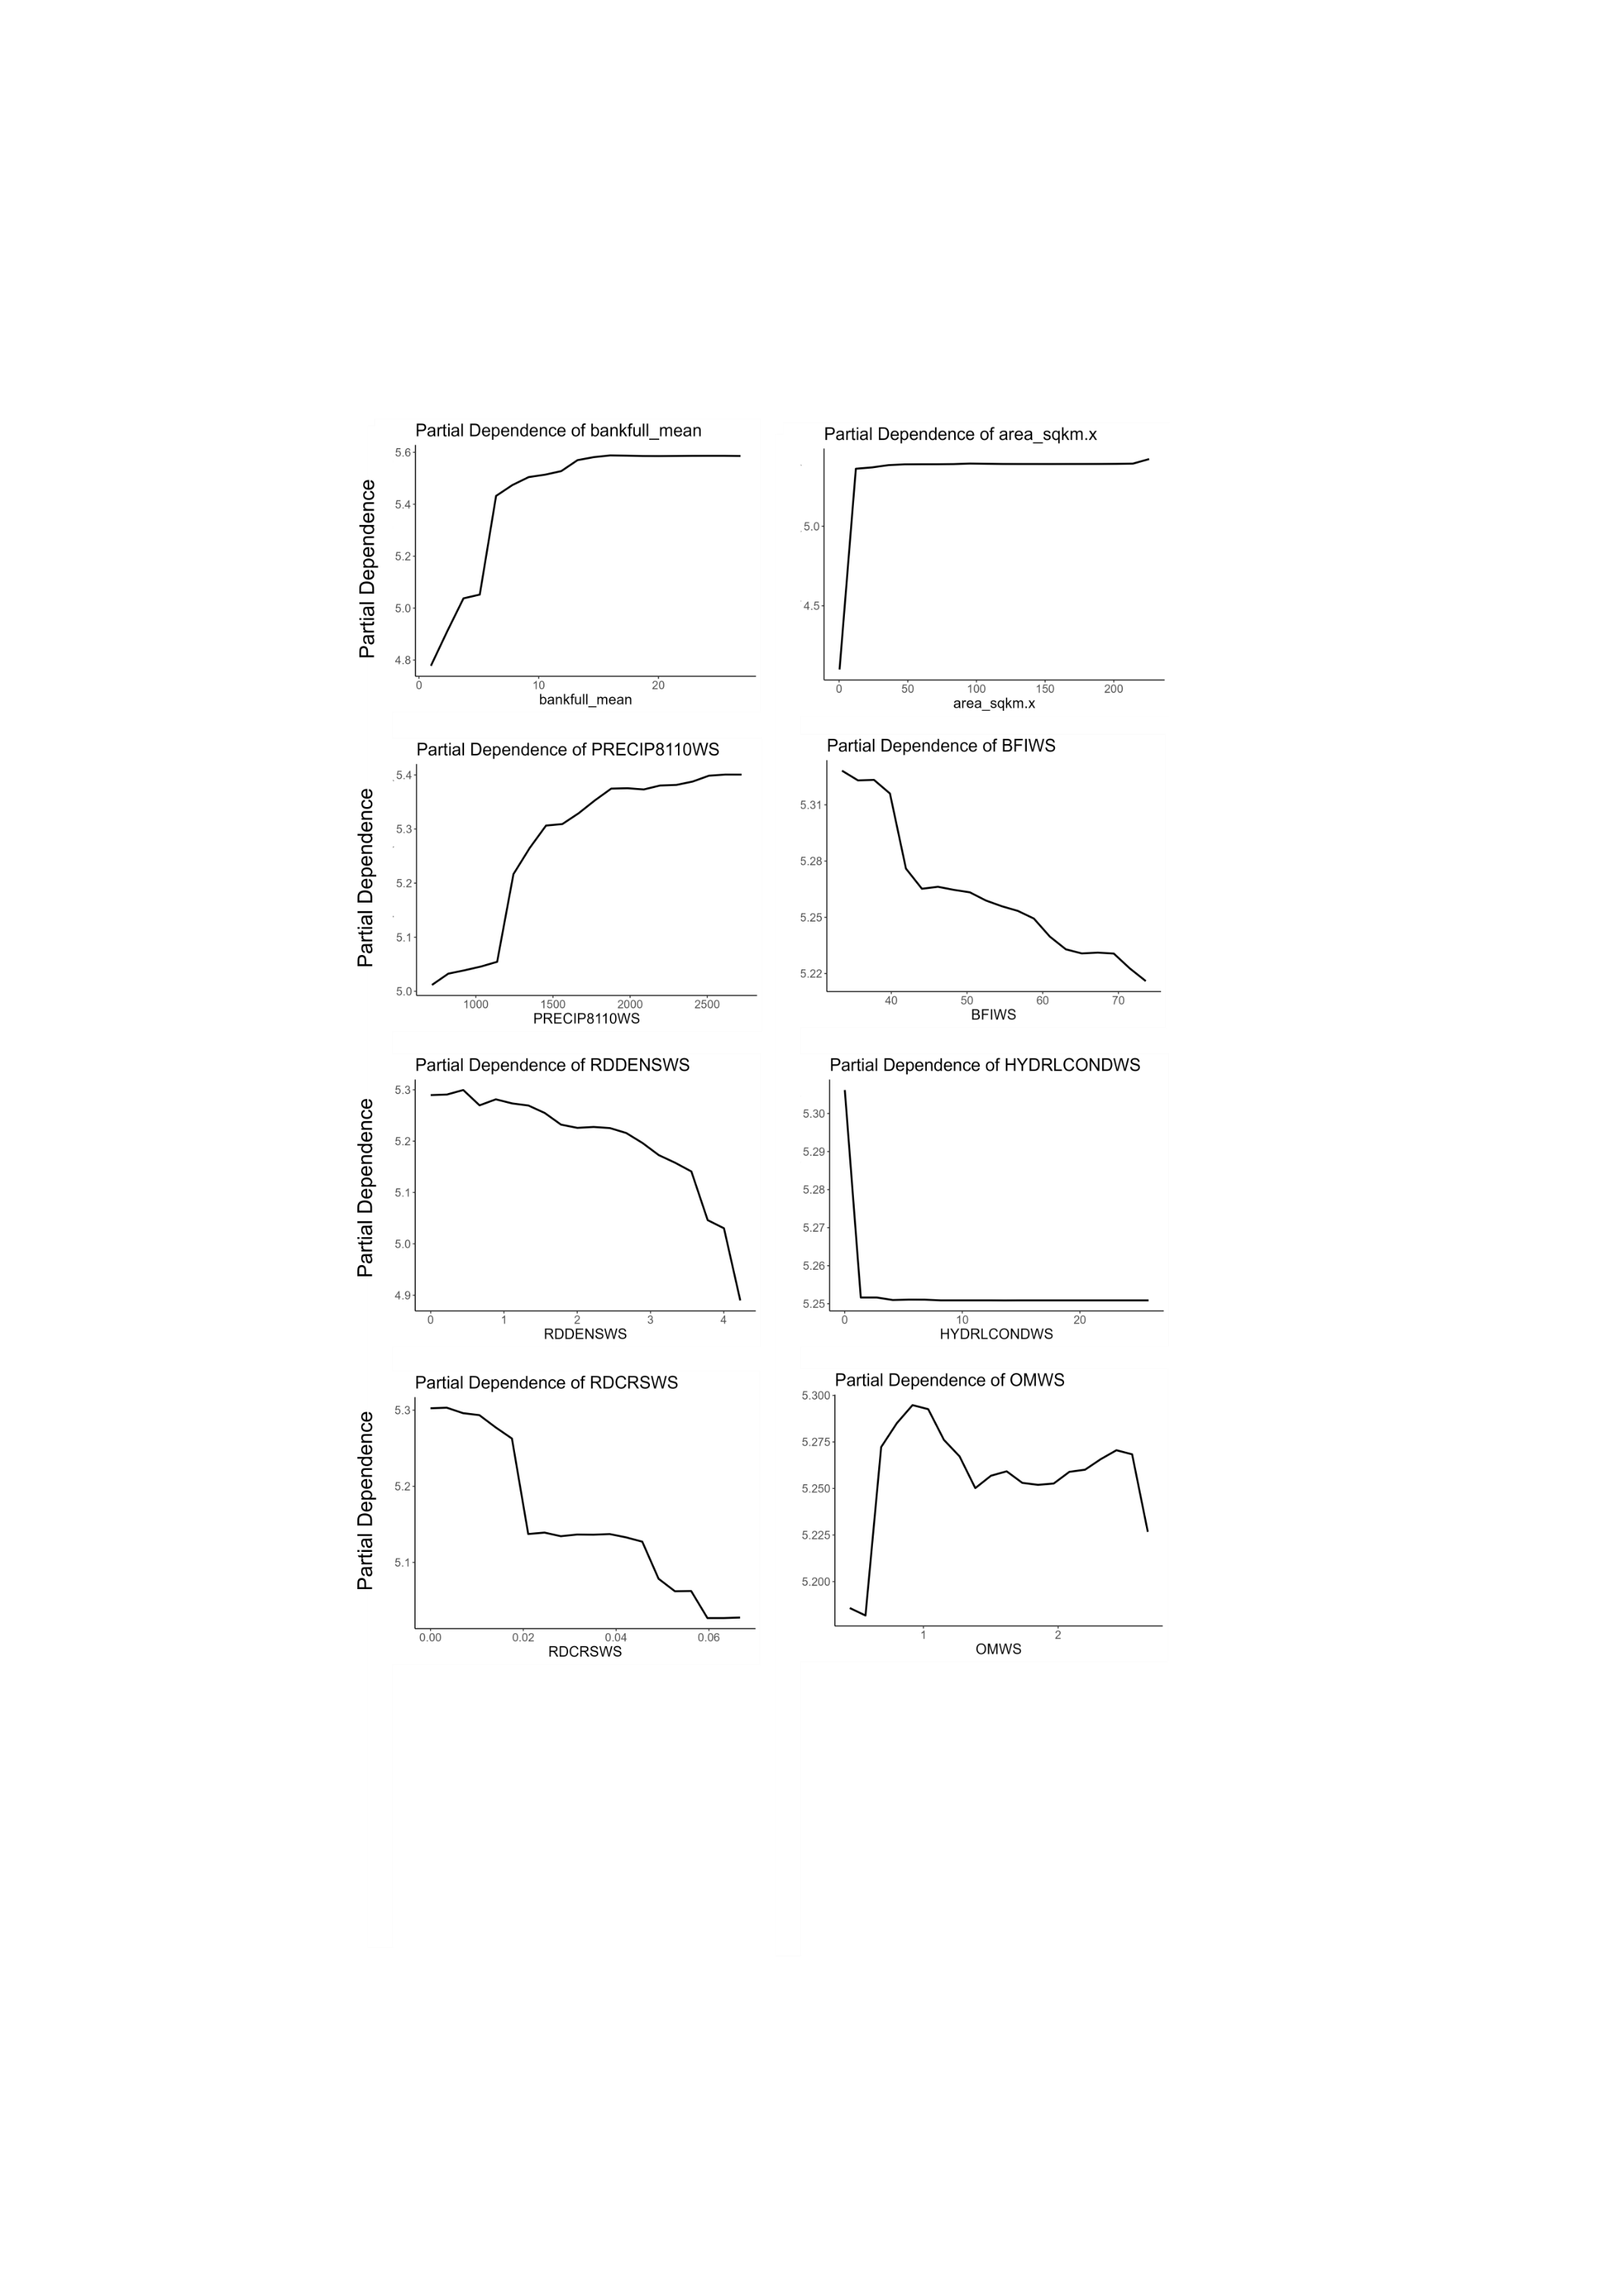


Figure 7. Partial dependence plots for the nine most important variables for the Klamath Unburned D50 model. Two of the top ten most important variables were categorical and therefore removed from this figure. This figure corresponds to Figure 4A in the text.


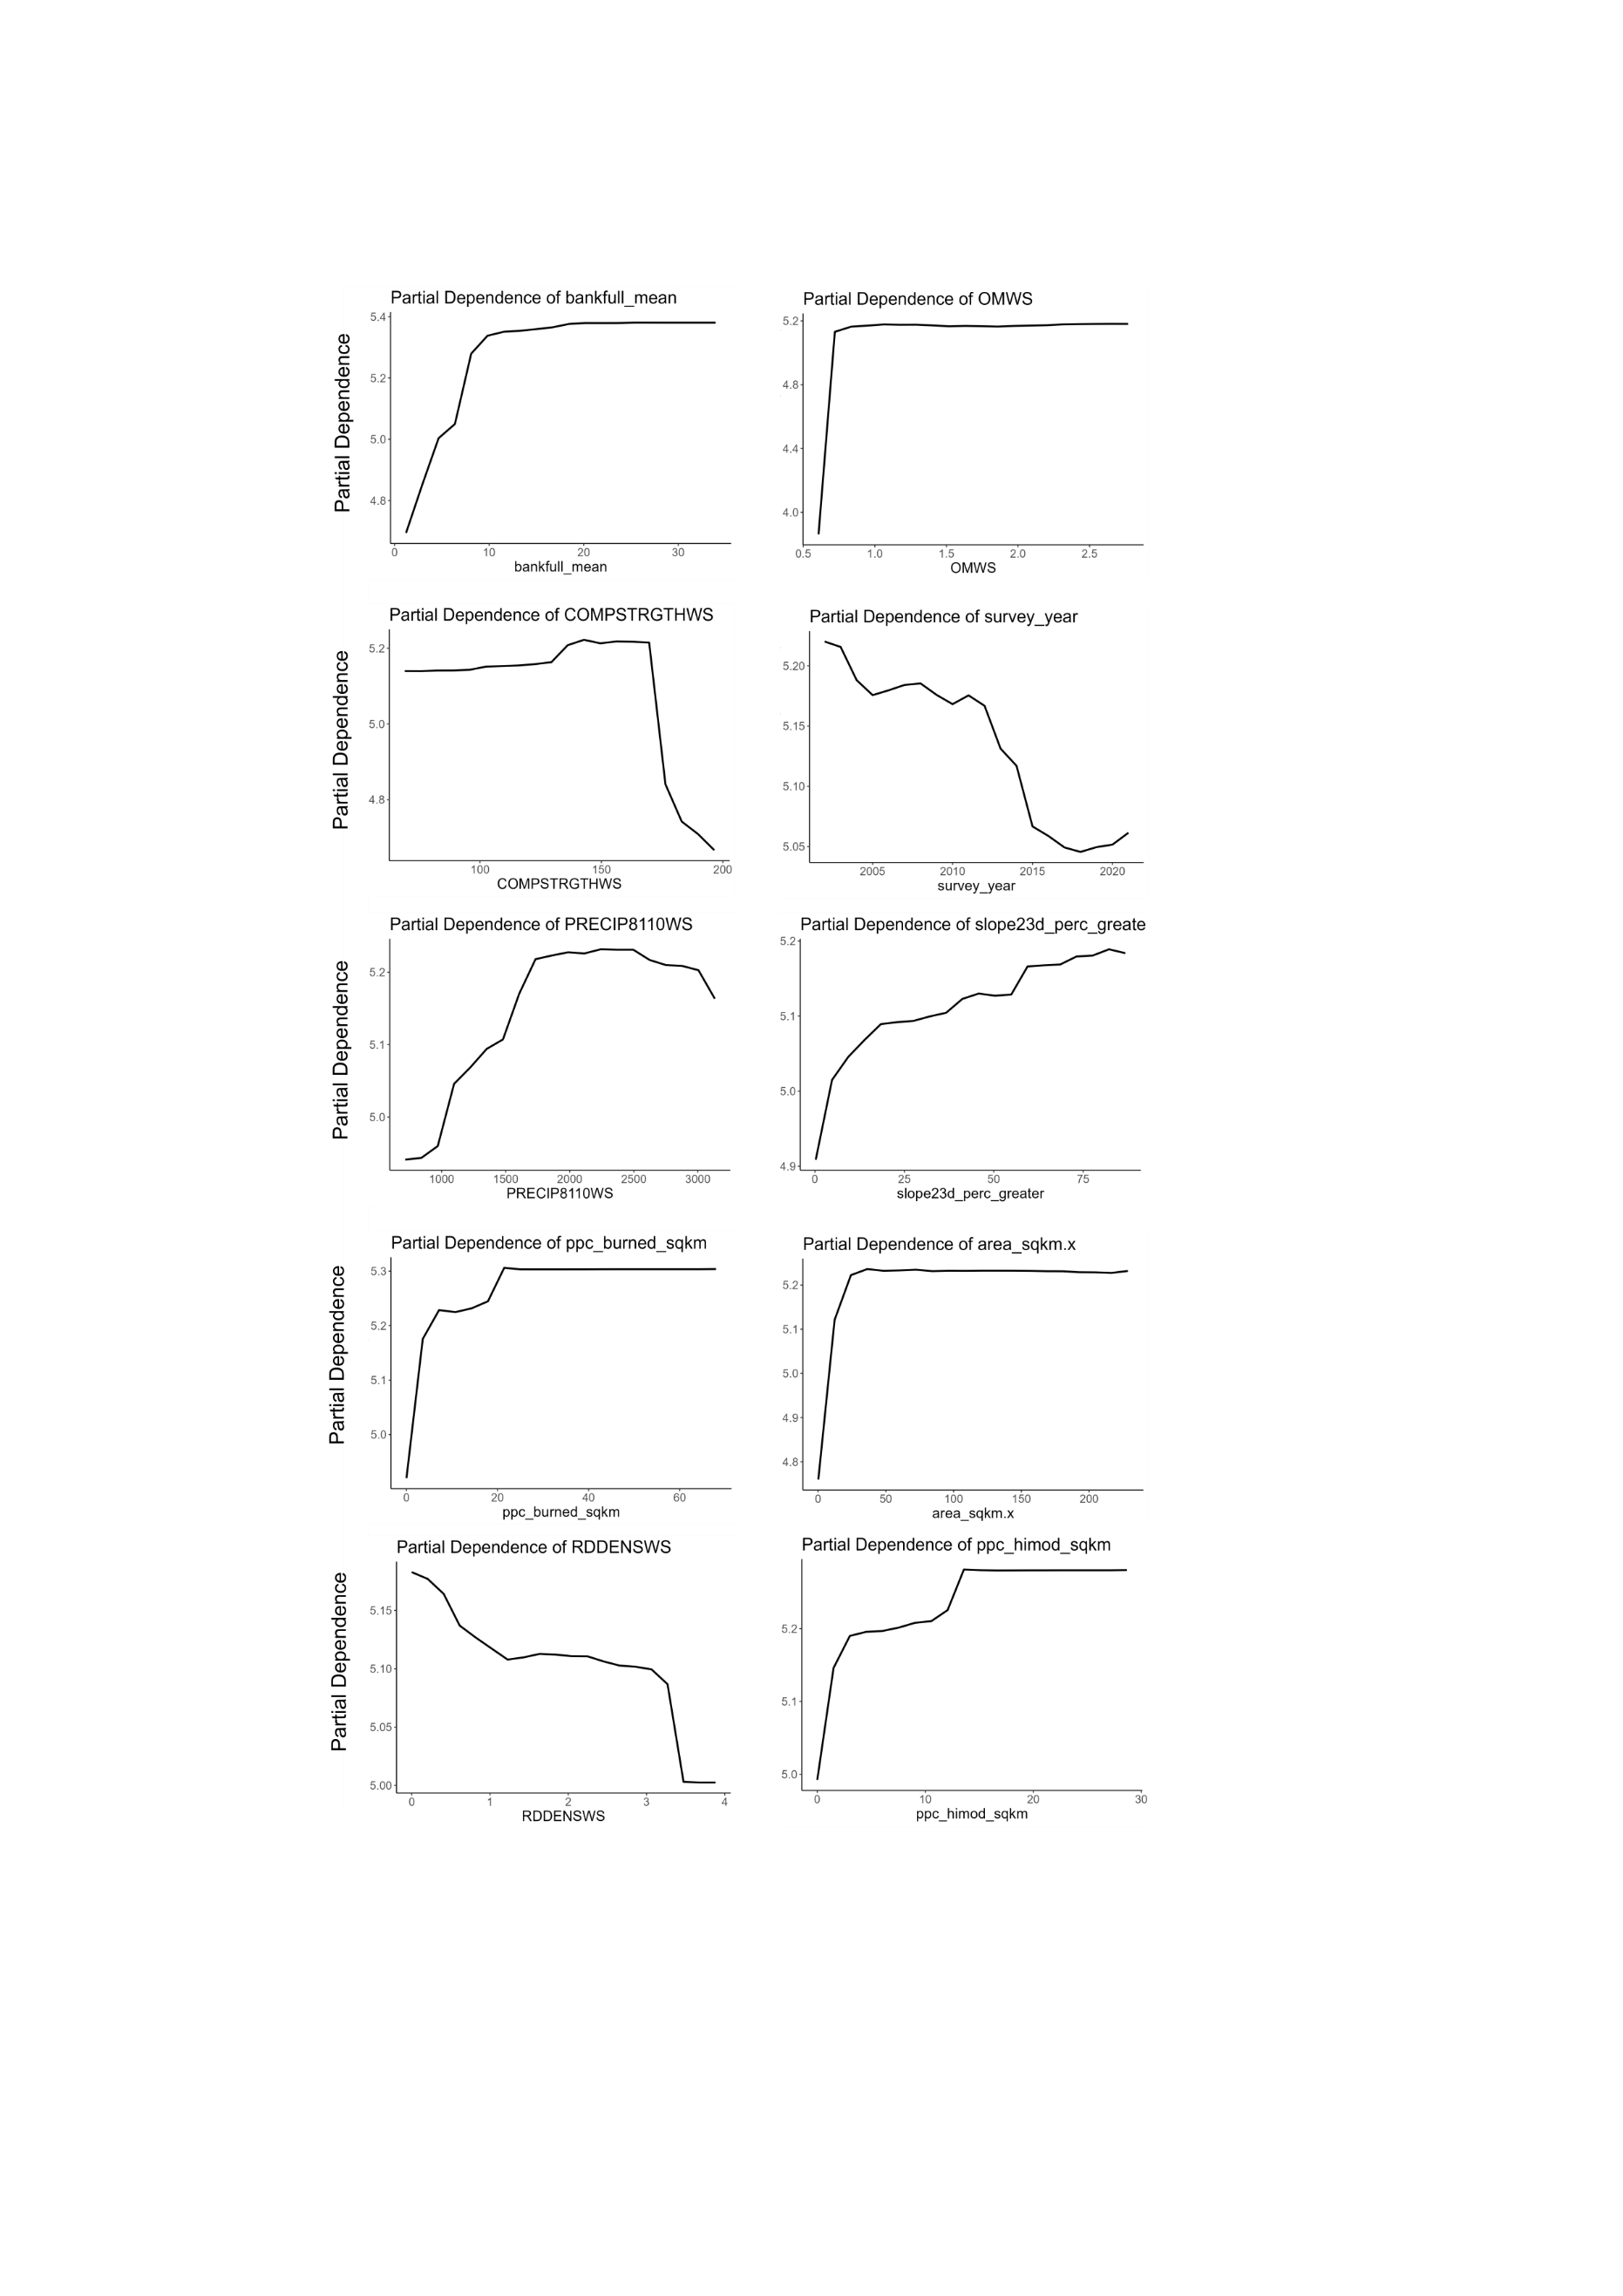


Figure 8. Partial dependence plots for the ten most important variables for the Klamath Post-fire D50 model. This figure corresponds to Figure 4B in the text.
